1 Low Intensity Vibration Restores Nuclear YAP Levels and Acute YAP Nuclear Shuttling in  
2 Mesenchymal Stem Cells Subjected to Simulated Microgravity

3

4 Thompson M<sup>1</sup>, Woods K<sup>2</sup>, Newberg, J<sup>1</sup>, Oxford JT<sup>2</sup>, Uzer G<sup>1†</sup>

5 <sup>1</sup> Mechanical and Biomedical Engineering, Boise State University

6 <sup>2</sup> Biomolecular Sciences Graduate Program, Boise State University

7 **† Corresponding Author**

8

9 **Running title:** LIV rescues SMG-inhibited YAP nuclear entry

10

11 Funding support: NASA ISGC NNX15AI04H, NIH R01AG059923, and 5P2CHD086843-03,  
12 P20GM109095, P20GM103408 and NSF 1929188.

13

14 **† Corresponding author:**

15 Gunes Uzer PhD

16 Boise State University

17 Department of Mechanical and Biomedical Engineering

18 1910 University Drive, MSd-2085

19 Boise, ID 83725-2085

20 Ph. (208) 426-4461

21 **Email: [gunesuzer@boisestate.edu](mailto:gunesuzer@boisestate.edu)**

22

23

24

25

26

27 **Abstract**

28 Reducing the bone deterioration that astronauts experience in microgravity requires  
29 countermeasures that can improve the effectiveness of rigorous and time-expensive exercise  
30 regimens under microgravity. The ability of low intensity vibrations (LIV) to activate force-  
31 responsive signaling pathways in cells suggests LIV as a potential countermeasure to improve  
32 cell responsiveness to subsequent mechanical challenge. Mechanoreponse of mesenchymal  
33 stem cells (MSC) which maintain bone-making osteoblasts is in part controlled by the  
34 “mechanotransducer” protein YAP (Yes-associated protein) which is shuttled into the nucleus in  
35 response cyto-mechanical forces. Here, using YAP nuclear shuttling as a measure of MSC  
36 mechanoreponse, we tested the effect of 72 hours of simulated microgravity (SMG) and daily  
37 LIV application (LIV<sub>DT</sub>) on the YAP nuclear entry driven by either acute LIV (LIV<sub>AT</sub>) or  
38 Lysophosphohaditic acid (LPA), applied at the end of the 72h period. We hypothesized that  
39 SMG-induced impairment of acute YAP nuclear entry will be alleviated by daily application of  
40 LIV<sub>DT</sub>. Results showed that while both acute LIV<sub>AT</sub> and LPA treatments increased nuclear YAP  
41 entry by 50% and 87% over the basal levels in SMG-treated MSCs, nuclear YAP levels of all  
42 SMG groups were significantly lower than non-SMG controls. Daily dosing of LIV<sub>DT</sub>, applied in  
43 parallel to SMG, restored the SMG-driven decrease in basal nuclear YAP to control levels as  
44 well as increased the LPA-induced but not LIV<sub>AT</sub>-induced YAP nuclear entry over the non-LIV<sub>DT</sub>  
45 treated, SMG only, counterparts. These cell level observations suggest that utilizing daily LIV  
46 treatments is a feasible countermeasure for increasing the YAP-mediated anabolic  
47 responsiveness of MSCs to subsequent mechanical challenge under SMG.

48

49 **Key Words:** Simulated Microgravity, Low Intensity Vibrations, YAP, Nucleus, Mesenchymal  
50 Stem Cells, Mechanosignaling

51

52

## 53 Introduction

54 The musculoskeletal deterioration which astronauts experience on long-term space missions  
55 and the resulting increase of traumatic physical injury risk is in part due to the reduction of  
56 mechanical loading on the musculoskeleton <sup>1</sup>. To alleviate the detrimental effects of unloading,  
57 astronauts undergo intensive regimens of running and resistance training in orbit <sup>2</sup>. Despite  
58 these efforts, astronauts lose an average bone density of 1% for each month they spend in  
59 space <sup>3</sup>. This loss necessitates new non-pharmacologic therapies in addition to exercise to keep  
60 bones healthy during long-term space missions. In bone, tissue level response to mechanical  
61 challenge is in part regulated by osteoblasts and osteocytes <sup>4</sup>. Both osteoblasts and osteocytes  
62 in turn share a common progenitor: the mesenchymal stem cell (MSC). Therefore, the growth  
63 and differentiation of MSCs in response to mechanical stimulation is required for the  
64 maintenance and repair of bone <sup>5</sup>. It is for this reason that the MSCs are a potential target for  
65 mechanical therapies aiming to alleviate bone loss in astronauts, injured service personnel with  
66 long periods of bedrest, and physically inactive aged individuals <sup>6</sup>.

67  
68 To maintain healthy bone making cell populations, MSCs rely on environmental mechanical  
69 signals inside the bone marrow niches and near bone surfaces. While the exact characteristics  
70 of the mechanical environment in which MSCs exist remains to be quantified, it is known that  
71 during habitual activities, our bones are subjected to combinations of complex loads including  
72 strain, fluid shear, and acceleration, each of which is inseparable <sup>7</sup>. For example, during  
73 moderate running, cortical bone can experience strains up to  $2000\mu\epsilon$  <sup>8,9</sup>, which also generates  
74 coupled fluid flow within canaliculi of up to  $100\mu\text{m/s}$  <sup>10</sup>. The interior of bone is filled with bone  
75 marrow with viscosities in the range of 400-800cP <sup>11</sup>. During moderate running, tibial  
76 accelerations are within the 2-5g range <sup>12</sup> ( $1\text{g} = 9.81 \text{ m/s}^2$ ), creating a complex loading at the  
77 bone-marrow interface that depends on many factors including frequency, amplitude, and  
78 viscosity <sup>13</sup>. *In silico* studies reveal that when exposed to vibrations (0.1-2g), marrow-filled

79 trabecular compartments generate fluid shear stresses up to 2Pa<sup>13,14</sup>, capable of driving bone  
80 cell functions<sup>15</sup>. Interestingly, while these high magnitude forces are only experienced a few  
81 times during the day, bones are bombarded by smaller mechanical signals arising from muscle  
82 contractions that generate bone strains ranging between 2 to 10µε<sup>16</sup>. Exogenous application of  
83 small magnitude mechanical regimes in the form of low intensity vibrations (LIV) ranging  
84 between 0.1-2g acceleration magnitudes and 20-200Hz frequencies were shown to be effective  
85 in improving bone and muscle indices in clinical and preclinical studies<sup>17</sup>. At the cellular level,  
86 our group has reported that application of LIV increases MSC contractility<sup>18</sup>, activates RhoA  
87 signaling<sup>19</sup>, and results in increased osteogenic differentiation and proliferation of MSCs<sup>20</sup>.

88  
89 One of the most actively investigated signaling pathways that regulate the MSC  
90 mechanoresponse is the Yes-associated protein (YAP) signaling pathway. YAP depletion in  
91 stem cells results in reduced proliferation and osteogenesis<sup>21,22</sup>. Similarly, depleting YAP from  
92 osteoblast progenitors decreases both bone quality and quantity in mice<sup>23</sup>. Functionally, in  
93 response to cytomechanical forces and substrate stiffness, YAP moves from the cytoplasm to  
94 the nucleus where it interacts with its co-transcriptional activators such as TEAD to regulate  
95 gene expression related to proliferation<sup>24</sup>. For example, application of substrate strain induces  
96 YAP nuclear entry and YAP transcriptional activity which is required to activate proliferation<sup>25</sup>.  
97 While it has been shown that YAP nuclear entry is triggered by soluble factors that increase F-  
98 actin contractility such as Lysophosphatidic acid (LPA)<sup>26,27</sup>, large changes in substrate stiffness  
99<sup>22</sup>, or substrate stretch ranging from 3% to 15%<sup>25,28</sup>, it is not known if low magnitude signals like  
100 LIV also trigger acute YAP nuclear entry.

101  
102 Research aimed at studying the effects of microgravity at the cellular level often relies on  
103 simulated microgravity (SMG) devices designed to alter the gravitational conditions that cells  
104 experience by rotating on one or multiple axes at low speed<sup>29-31</sup>. SMG decreases MSC

105 proliferation<sup>32</sup> and cytoskeletal contractility<sup>29,33,34</sup>. In this way, application of physical or soluble  
106 factors that induce cytoskeletal contractility are commonly used as countermeasures for SMG  
107<sup>35,36</sup>. SMG also alters nuclear structure. Research from our group has shown that SMG results in  
108 reduced levels of integral nuclear proteins such as Lamin A/C and LINC (Linker of  
109 Nucleoskeleton and Cytoskeleton) complex elements Sun-2<sup>37</sup>. As mechanically induced  
110 nuclear shuttling of YAP and its paralog TAZ have been associated with LINC complex function  
111<sup>38</sup>, SMG also results in decreased nuclear levels of the YAP paralog protein TAZ<sup>35</sup>.  
112 Interestingly, twice daily application of LIV for 20 minutes during SMG recovers both MSC  
113 proliferation and levels of nuclear envelope proteins Lamin A/C and Sun-2, suggesting LIV as a  
114 potential countermeasure to improve YAP-mediated mechanosignaling in MSCs under SMG.  
115  
116 In this study, using YAP nuclear shuttling as a measure of MSC mechanoresponse, we tested  
117 the effect of 72 hours of simulated microgravity (SMG) and daily LIV application (LIV<sub>DT</sub>) on the  
118 YAP nuclear entry driven by either acute LIV (LIV<sub>AT</sub>) or Lysophosphohaditic acid (LPA), applied  
119 at the end of the 72h period. We hypothesized that SMG-induced impairment of YAP nuclear  
120 entry in response to mechanical and soluble factors would be alleviated by daily application of  
121 LIV.

122

## 123 **Results**

### 124 *Acute LIV<sub>AT</sub> application increases nuclear YAP levels*

125 To quantify the acute YAP nuclear entry in response to LIV, MSCs were plated at density of  
126 5,200 cells/cm<sup>2</sup> and were allowed to attach for 24hr. Following this, MSCs were subjected to  
127 treatment in two groups: control and acute LIV treatment regimen (LIV<sub>AT</sub>). The LIV<sub>AT</sub> regimen  
128 consisted of 5x 20min vibration periods separated by 1hr in between each repetition at room  
129 temperature while control samples were treated identically (also taken out of the incubator) but  
130 were not vibrated. Immediately after LIV<sub>AT</sub>, samples were immunostained for YAP and DAPI.

131 MATLAB was used to quantify the changes in the nuclear YAP levels. As shown in **Fig.1a**,  
132 confocal images showed increased nuclear YAP following the LIV<sub>AT</sub> treatment. Analysis of  
133 confocal images to quantify nuclear YAP intensity shown in **Fig.1b** revealed a 32% increase in  
134 the nuclear YAP levels in the LIV<sub>AT</sub> samples as compared to the control samples (p<0.0001).  
135 We also used C2C12 myoblasts to confirm the LIV<sub>AT</sub> induced YAP nuclear entry on a second  
136 cell line, quantitative analysis of confocal images showed a 40% increase of nuclear YAP in  
137 LIV<sub>AT</sub> samples compared to controls (**Fig.S1**). As both LIV-induced focal adhesion signaling,  
138 initiated by focal adhesion kinase (FAK) phosphorylation at Tyr 397 residue <sup>19</sup>, and YAP nuclear  
139 entry in response to substrate strain <sup>28</sup> requires intact LINC function, disabling LINC function via  
140 a dominant negative overexpression of Nesprin KASH (Klarsicht, ANC-1, Syne homology)  
141 fragment both decreased basal nuclear YAP levels by 34% (p<0.0001) and impeded the LIV-  
142 induced YAP nuclear entry when compared to empty plasmid (**Fig.S2**). FAK phosphorylation at  
143 Tyr 397 residue (pFAK) was blocked via a FAK inhibitor (FAKi) PF573228 (3μM) 1hr prior to  
144 LIV<sub>AT</sub> treatment as previously described <sup>19</sup> and stained against DAPI and YAP (**Fig.S3a**). FAKi  
145 inhibited the LIV<sub>AT</sub> induced pFAK and decreased its basal levels (**Fig.S3b**). As shown in  
146 **Fig.S3c**, measuring nuclear YAP levels showed that LIV<sub>AT</sub> induced YAP nuclear entry was not  
147 affected by FAKi when compared DMSO treated controls.

148

149 *Basal nuclear YAP levels decreased by SMG were rescued by daily application of LIV<sub>DT</sub>*

150 We next tested whether SMG decreases basal YAP levels and whether a daily LIV treatment  
151 regimen (LIV<sub>DT</sub>), applied in parallel with SMG, could alleviate decreased YAP in the nucleus. As  
152 we reported previously, LIV<sub>DT</sub> consisting of 2x 20min vibrations applied every 24 hours during  
153 the 72h period of SMG. This LIV<sub>DT</sub> regimen was effective at restoring MSC proliferation and  
154 whole cell YAP levels when applied in conjunction with SMG <sup>37</sup>. MSCs were plated at a density  
155 of 1,700 cells/cm<sup>2</sup> in 9cm<sup>2</sup> tissue culture SlideFlasks (Nunc, #170920) and were allowed to  
156 attach for 24h, after which point, the flasks were filled completely with growth medium, sealed,

157 and subjected to 72h of treatment followed by immunostaining for YAP and nuclear staining  
158 using DAPI. During the 72h treatment period, MSCs were divided into three groups: control  
159 samples, SMG samples which were subjected to the 72h SMG alone, and SMG+LIV<sub>DT</sub> samples  
160 which were subjected to both the 72h SMG regimen and the daily LIV<sub>DT</sub> regimen.

161 Representative images for YAP and DAPI stained images are shown in **Fig.2a**. As depicted in  
162 **Fig.2b**, quantitative analysis of confocal images revealed a 42% decrease in the nuclear YAP  
163 intensity of the SMG group as compared to non-SMG controls ( $p < 0.0001$ ). Compared to the  
164 SMG group, the LIV<sub>DT</sub> group increased nuclear YAP levels by 67% ( $p < 0.0001$ ) and there was no  
165 significant difference between nuclear YAP levels of LIV<sub>DT</sub> treated MSCs and non-SMG controls.

166  
167 *LIV<sub>AT</sub>-induced YAP nuclear entry decreased by SMG was not restored by daily LIV<sub>DT</sub> application*

168 As SMG decreased basal nuclear YAP levels, we next tested whether SMG decreases LIV<sub>AT</sub>-  
169 induced YAP mechanosignaling (i.e. nuclear shuttling). Since LIV<sub>DT</sub> was able to restore nuclear  
170 YAP levels (**Fig.2**), the SMG+LIV<sub>DT</sub> group was added to evaluate the effect of LIV<sub>DT</sub> on the SMG  
171 response. A schematic of the experimental design is given in **Fig.3**. MSCs were divided into six  
172 groups in which the CTRL, SMG, SMG+LIV<sub>DT</sub> groups were treated with  $\pm$ LIV<sub>AT</sub> at the end of 72h  
173 and nuclear YAP levels were measured. As shown in **Fig.4**, SMG alone decreased basal  
174 nuclear YAP levels by 37% ( $p < 0.0001$ ) which were restored back to control levels in the  
175 SMG+LIV<sub>DT</sub> group. As depicted in **Fig.4**, +LIV<sub>AT</sub> increased nuclear YAP levels in the CTRL,  
176 SMG and SMG+LIV<sub>DT</sub> groups by 50%, 69% and 22%, respectively ( $p < 0.0001$ ) while exhibiting  
177 the smallest increase in the SMG+LIV<sub>DT</sub>. As a result, final nuclear YAP levels in the  
178 SMG+LIV<sub>DT</sub>+LIV<sub>AT</sub> group was not significantly different from the SMG+LIV<sub>AT</sub> and 23% lower than  
179 the LIV<sub>AT</sub> group ( $p < 0.0001$ ). Representative confocal images are presented in **Fig.S4**.

180

181 *LPA treatment increases nuclear YAP levels*

182 As SMG+LIV<sub>DT</sub> treatment did not improve the acute LIV<sub>AT</sub> response when compared to the SMG  
183 group, we next considered a soluble regulator of cytoskeletal contractility, LPA<sup>20</sup>. To test the  
184 effect of LPA on the acute YAP nuclear entry, two LPA concentrations (50μM and 100μM) were  
185 compared against control samples. Shown in **Fig.5**, nuclear YAP levels were almost doubled  
186 under a two-hour exposure to 50μM LPA and 100μM LPA treatments with 99% and 107%  
187 increases as compared to the control samples (p<0.0001). Nuclear YAP levels for 50μM LPA  
188 and 100μM LPA treatments were not significantly different. Therefore, we chose to use 50μM  
189 LPA treatment in the subsequent experiments.

190

#### 191 *LPA-induced YAP nuclear entry decreased by SMG was alleviated by daily LIV<sub>DT</sub> application*

192 In order to evaluate whether LIV<sub>DT</sub> can restore LPA-induced YAP nuclear entry after SMG,  
193 50μM LPA dissolved in DMSO or DMSO as vehicle control were added to the samples at the  
194 end of the 72h treatment of either CTRL, SMG or SMG+LIV<sub>DT</sub> treatments. The CTRL group,  
195 SMG group, and SMG+LIV<sub>DT</sub> group were subjected to the same treatment as in the previous  
196 experiments and displayed similar results. As depicted in **Fig.6**, +LPA increased nuclear YAP  
197 levels in the CTRL, SMG and SMG+LIV<sub>DT</sub> groups by 105%, 67% and 43% respectively  
198 (p<0.0001). While final YAP nuclear levels in SMG+LIV<sub>DT</sub>+LPA remained 70% higher than  
199 SMG+LPA group (P<0.0001), it remained 29% lower than the LPA group (P<0.0001).

200

#### 201 *MSC stiffness and structure remain intact under SMG and SMG+LIV<sub>DT</sub> treatments*

202 As YAP mechanosignaling of SMG+LIV<sub>DT</sub> MSCs remained below control levels in response to  
203 both LIV<sub>AT</sub> and LPA, we quantified the effects of SMG and SMG+LIV<sub>DT</sub> on the cell stiffness, F-  
204 actin intensity, cell area and nuclear area. AFM testing was used to quantify the elastic modulus  
205 of the nucleus by measuring load-displacement curves on top of the nucleus. AFM tests shown  
206 in **Fig.7a** indicated a 21% and 27% stiffness decrease in the SMG or SMG+LIV<sub>DT</sub> groups but  
207 differences were not significant. Quantified from confocal images (**Fig.7b**), mean F-actin



208 intensities for all the cells in each imaging field were quantified by dividing the mean F-actin  
209 intensity to the number of nuclei in each imaging field. Shown in **Fig.7c**, SMG and SMG+LIVDT  
210 treated MSCs revealed 36% and 30% decreases in the mean F-actin intensity per cell,  
211 respectively but the differences were not statistically significant. We have further quantified  
212 nuclear area as a measure of cyto-mechanical forces on the nucleus<sup>39</sup>. Shown in **Fig.7d**,  
213 analysis of cross-sectional area of cell nuclei using DAPI stained images revealed no significant  
214 effect on average nuclear size by either SMG or combined SMG+LIV<sub>DT</sub> treatment compared to  
215 control levels.

216

## 217 **Discussion**

218 The mechanical forces that the bone and muscle cells are subjected to on Earth and in  
219 microgravity are complex and remain incompletely understood. At the same time, it is clear that  
220 these forces are required for healthy tissue growth and function. The complexity of these forces  
221 makes it difficult to design experiments that comprehensively simulate *in vivo* conditions. While  
222 the *in vitro* experiments utilizing SMG and LIV treatments used in this study are limited in this  
223 way and do not entirely correlate with the physiological behavior of these cells *in vivo*, the  
224 experiments presented here remain useful for testing cell behavior under well-defined  
225 conditions.

226

227 In this study, we focused on YAP mechanosignaling of MSCs. The first experiments  
228 demonstrated that repeated LIV<sub>AT</sub> application over six hours was capable of stimulating YAP  
229 entry into the nucleus in both MSCs (**Fig.1**) and in C2C12 cell line (**Fig.S1**). These findings  
230 suggest that similar to high magnitude substrate strains<sup>25</sup> smaller mechanical signals such as  
231 LIV can be effective at increasing nuclear YAP levels. Further, in agreement with earlier reports  
232 utilizing uniaxial strain<sup>28</sup>, LIV<sub>AT</sub>-induced increase in nuclear YAP levels also required functional  
233 LINC complexes (**Fig.S2**). Integrin related FAK signaling have been shown to promote YAP

234 nuclear levels in the proliferative descendants of stem cells and that FAK inhibitor PF573228  
235 decreased nuclear YAP in these cells <sup>40</sup>. Similarly, inhibiting integrin engagement via blocking  
236 FAK phosphorylation in Tyr 397 residue via FAKi also mutes the increase of GTP-bound RhoA  
237 levels in LIV treated MSCs <sup>19</sup>. While we confirmed the loss of phosphorylation in Tyr 397 at both  
238 basal level and in response to LIV<sub>AT</sub> (**Fig.S3b**), FAKi treatment changed neither basal levels nor  
239 the LIV<sub>AT</sub>-induced increase in nuclear YAP (**Fig.S3c**), suggesting a FAK independent  
240 mechanism. In these experiments, we did not compare LIV<sub>AT</sub> with strain because the application  
241 of 5 to 15% stretch onto sealed culture flasks was not technically possible without significantly  
242 altering experimental conditions. Instead, LPA addition served as the best option for applying a  
243 simple mechanical stimulation in order to evaluate the YAP mechanotransduction. LPA is a  
244 phospholipid derivative signaling molecule which is capable of causing the simulation of static  
245 transient stretch of a cell by increasing the contractility of the cytoskeleton <sup>20,41</sup>. The first  
246 experiments with LPA served to verify that the simulation of stretch via increased cytoskeleton  
247 contractility was capable of triggering YAP entry into the nucleus and the analysis methods  
248 utilized here were capable of detecting this response (**Fig.5**).

249  
250 The first SMG experiments confirmed a clear decrease of basal nuclear YAP levels.  
251 Interestingly, SMG treated cells remained responsive, as both LIV<sub>AT</sub> and LPA treatments were  
252 able to increase the nuclear YAP levels at the end of acute stimulation period (< 6h). However,  
253 final nuclear YAP levels in SMG treated MSCs remained significantly lower when compared to  
254 non-SMG groups (**Fig.2, 4 & 6**). These findings suggested that the YAP mechanosignaling  
255 apparatus of MSCs, to some extent, was intact under SMG. When applied in parallel to SMG,  
256 daily LIV<sub>DT</sub> treatment was able to restore basal YAP levels in the cell nucleus (**Fig.2, 4 & 6**)  
257 measured 24h after the final LIV<sub>DT</sub> treatment. This increase in nuclear levels supported our  
258 earlier report that showed sustained recovery of MSC proliferation by LIV<sub>DT</sub> <sup>37</sup>.

259

260 Interestingly, this increase in basal nuclear YAP levels under LIV<sub>DT</sub> was accompanied by a  
261 reduced MSC response to LIV<sub>AT</sub> treatment (**Fig.4**). When SMG+LIV<sub>DT</sub> treated MSCs were  
262 subjected to LIV<sub>AT</sub>, the increase in nuclear YAP from the non-LIV<sub>AT</sub> control was only 22%  
263 ( $p < 0.0001$ ), which was small compared to the 77% increase seen in the SMG groups in  
264 response to LIV<sub>AT</sub>. As a result of this smaller increase in the SMG+LIV<sub>DT</sub> group, there was no  
265 measurable difference between SMG and SMG+LIV<sub>DT</sub>, samples that were subjected to LIV<sub>AT</sub>. It  
266 has been previously reported that an application of multiple LIV bouts separated by a refractory  
267 period is more effective at activating mechano-signaling pathways such as  $\beta$ catenin<sup>42</sup>. It is  
268 possible that long term application of LIV<sub>DT</sub> results in cell structural adaptations that serve to  
269 reduce MSC responsiveness to LIV<sub>AT</sub> treatment. To test this possibility, we replaced LIV<sub>AT</sub> with  
270 an LPA treatment. When LIV<sub>AT</sub> was replaced by LPA treatment (**Fig.6**), responsiveness of  
271 SMG+LIV<sub>DT</sub> treated MSCs almost doubled to 43% (compared to 22% in response to LIV<sub>AT</sub>) and  
272 was significantly higher than the SMG+LPA group ( $p < 0.0001$ ), suggesting that LIV<sub>DT</sub> increases  
273 the YAP-mechanosignaling in response to LPA.

274  
275 Absolute nuclear YAP intensity in the SMG+LIV<sub>DT</sub>+LIV<sub>AT</sub> group, however, remained below the  
276 LIV<sub>AT</sub> group ( $p < 0.0001$ ). Previously published findings using the same treatment protocols  
277 suggested that the total cellular YAP levels decreased by SMG were restored to control levels  
278 by daily LIV<sup>37</sup>. This indicates that total availability of YAP protein was not responsible for this  
279 difference between the SMG+LIV<sub>DT</sub>+LIV<sub>AT</sub> and the LIV<sub>AT</sub> groups. In regards to other potential  
280 effects of SMG on the components of the mechanosignaling mechanism, one current prevailing  
281 hypothesis suggests a role for nuclear pore opening in response to cyto-mechanical forces<sup>38</sup>  
282 which may be affected by changes in the nuclear stiffness. To test this possibility, we performed  
283 additional AFM and imaging experiments. While the AFM measured nuclear stiffness was 24%  
284 lower in the SMG and SMG+LIV<sub>DT</sub> groups on average, we were unable to identify any  
285 statistically significant effects of SMG or LIV<sub>DT</sub> treatment on nuclear stiffness. There was also

286 slight F-actin intensity decreases in both the SMG and SMG+LIV<sub>DT</sub> groups which were also not  
287 significant (**Fig.7**). Similarly, cell and nuclear area were not affected. While our results were not  
288 able to detect any changes in nuclear stiffness, considering the significant role that the nuclear  
289 membrane plays as a mechanical structural component in the cell's interpretation of mechanical  
290 stimulus<sup>43,44</sup>, more detailed future studies are needed to study the effects of SMG on the  
291 nuclear envelope and nuclear structure.

292  
293 In summary, while the restoration of basal nuclear levels and improvement of LPA induced YAP  
294 nuclear entry under daily LIV<sub>DT</sub> treatment identify LIV as a possible countermeasure to improve  
295 MSC response under the detrimental effects of simulated microgravity, future studies are  
296 required to understand why acute YAP nuclear entry in response to mechanical and soluble  
297 factors remain less responsive.

298

## 299 **Methods and Materials**

### 300 Cell Culture

301 Primary mouse bone marrow derived MSC's were extracted as previously described<sup>37,45</sup>.  
302 C2C12 mouse myoblasts were derived from muscle satellite cells. MSCs were subcultured and  
303 plated in Iscove modified Dulbecco's cell culture medium (IMDM, 12440053, Gibco) with 10%  
304 fetal calf serum (FCS, S11950H, Atlanta Biologicals) and 1% pen/strep. C2C12s were  
305 subcultured and plated in Dulbecco's modified Eagle's medium (DMEM, DML09, Caisson  
306 Laboratories) with 10% fetal calf serum (FCS, S11950H, Atlanta Biologicals) and 1% pen/strep.  
307 MSCs were subcultured in 9cm<sup>2</sup> culture dishes at a density of 5,200cells/cm<sup>2</sup> for 1day  
308 experiments and 1700cells/cm<sup>2</sup> for 3day experiments, while C2C12s were plated at a density of  
309 10,000cells/cm<sup>2</sup>. Experimental cells were plated and given 24h to attach to the mounting surface  
310 prior to experiments. Cell passages for both MSCs and C2C12s used for experiments were  
311 limited to P7-P15.

312

### 313 Low Intensity Vibrations Treatment

314 SlideFlasks with plated MSCs were filled completely with culture medium and placed in LIV  
315 device designed and used in previous research (**Fig.3**)<sup>37</sup>. LIV device subjected cells to low  
316 intensity 90 Hz lateral vibrations at 0.7g at room temperature. MSCs were vibrated for 20min  
317 intervals separated over time. LIV<sub>AT</sub> regimen was applied after 72h treatment period and  
318 consisted of 5x 20min LIV with an hour in between each. Daily LIV<sub>DT</sub> regimen consisted of 3x  
319 treatments in parallel with SMG treatment each consisting of 2x 20min LIV with 2h in between.

320

### 321 Simulated Microgravity Treatment

322 SlideFlasks (Nunc, #170920) with plated MSCs were filled completely with culture medium  
323 (**Fig.3**) and placed in a clinostat SMG device. The clinostat shown is a redesign of a custom-  
324 made clinostat described in previous research<sup>37</sup> with a new flask holder casing capable of  
325 holding SlideFlasks and is also autoclavable. The clinostat was used to subject the MSCs to  
326 constant 15 RPM SMG for 72h.

327

### 328 Immunofluorescence Staining and Image Analysis

329 Immediately after mechanical treatment, MSCs plated in Slideflasks were removed from  
330 treatment, and the SlideFlasks were disassembled in order to stain the MSCs on the slides  
331 (**Fig.3**). The MSCs were fixed with 4% paraformaldehyde, then washed and permeabilized with  
332 0.05% Triton X-100 in PBS, followed by immunostaining with YAP specific antibody (YAP  
333 (D8H1X) Rabbit mAb, Cell Signaling Technologies) and Alexa Fluor red secondary antibodies  
334 (Donkey anti-Rabbit IgG (H+L) Cross-Adsorbed Secondary Antibody, Alexa Fluor Plus 594 for  
335 all experiments prior to usage of LPA. Subsequently, Donkey anti-Rabbit IgG (H+L) Cross-  
336 Adsorbed Secondary Antibody, Alexa Fluor Plus 633 was used). Nuclear DNA was labeled via  
337 DAPI (Vectashield Mounting Medium, Vector Laboratories). Stained samples were imaged with

338 a Leica TCS SP8 confocal microscope (40x, HC PL APO CS2 Oil Immersion) prior to usage of  
339 LPA, after this Zeiss LSM 510 Meta Confocal Microscope (40x, HC PL APO CS2 Oil Immersion)  
340 . Exported images were used to quantify relative YAP levels within each nuclei (nuclear regions  
341 traced by DAPI stained nucleus) via custom-made MATLAB program (The MathWorks, Natick,  
342 MA). DAPI images were analyzed using an edge-detection algorithm in order to determine the  
343 nuclear area for each cell. The nuclear outline was then used as a mask to quantify the average  
344 pixel intensity of the YAP stain within the nuclei of each individual cell. (n=50-100  
345 nuclei/sample).

346

#### 347 Atomic Force Microscopy

348 Bruker Dimension FastScan AFM was used for collection of the atomic force measurements.  
349 Tipless MLCT-D probes with a 0.03 N/m spring constant were functionalized with 10  $\mu\text{m}$   
350 diameter borosilicate glass beads for force collection. The AFM's optical microscope was used  
351 to locate individual live MSCs plated on the SlideFlask slides with the flask section removed for  
352 access to the cells. The nucleus of each cell was tested with at least 3 seconds of rest between  
353 each test. In each test, three force-displacement curves were obtained (ramping rate: 2  $\mu\text{m}/\text{sec}$   
354 over 2  $\mu\text{m}$  total travel, 1  $\mu\text{m}$  approach, 1  $\mu\text{m}$  retract), which were analyzed using Nanoscope  
355 software with the implementation of a best-fit curve to a Hertzian (spherical) model (optimized  
356 such that  $R^2$  value was greater than 0.95, or  $p < 0.05$ ) to obtain elastic moduli of nuclear  
357 membrane of individual nuclei.

358

#### 359 Western Blotting

360 Western blotting was performed as previously described.<sup>23,26,27,64</sup> 20 $\mu\text{g}$  of lysed cell protein from  
361 each sample was run on a 10% polyacrylamide gels, transferred onto a polyvinylidene difluoride  
362 (PVDF) membranes, blocked with 5% (w/v) milk for 1h. After washing, primary antibodies were  
363 incubated overnight at 4°C with. Protein bands were visualized via horseradish peroxidase-

364 conjugated secondary antibodies (1: 5,000, Cell Signaling) and ECL plus chemiluminescence kit  
365 (Amersham Biosciences, Piscataway, NJ) and scanned using C-DiGit blot scanner (Licor,  
366 Lincoln, NE). All blots derive from the same experiment and were processed in parallel.

367

### 368 Statistical analysis

369 All data analysis results were displayed graphically based on the mean value with standard  
370 error bars. Differences between treatments were not assumed to follow a Gaussian distribution.  
371 Therefore, group differences were identified via either non-parametric two-tailed Mann-Whitney  
372 U-test (**Fig.1a**) or Kruskal-Wallis test followed by Tukey multiple comparison (**Fig.2b, 4, 5, 6, 7,**  
373 **&S1, S2, S3**). P-values of less than 0.05 were considered significant.

374

### 375 Data availability

376 The datasets generated and/or analyzed during the current study are available from the  
377 corresponding author on reasonable request.

378

### 379 Ethics

380 All methods were carried out in accordance with relevant guidelines and regulations of Boise  
381 Institutional Animal Care and Use Committee and Institutional Biosafety Committee. All  
382 procedures were approved by Boise State University Institutional Animal Care and Use  
383 Committee, and Institutional Biosafety Committee.

384

### 385 Acknowledgements

386 This study was supported by NASA ISGC NNX15AI04H, NIH R01AG059923, and  
387 5P2CHD086843-03, P20GM109095, P20GM103408 and NSF 1929188.

388

### 389 Competing interests

390 The author(s) declare no competing interests, financial or otherwise.

391

392 Contributions

393 **Thompson, M** experimental methods, data analysis/interpretation, manuscript writing, final  
394 approval of manuscript.

395 **Woods, K** data analysis/interpretation, final approval of manuscript.

396 **Newberg, J** experimental methods, final approval of manuscript

397 **Oxford JT**, financial support, final approval of manuscript

398 **Uzer, G** concept/design, financial support, data analysis/interpretation, manuscript writing, final  
399 approval of manuscript

400

401 References

402 1 Smith, S. M. *et al.* Calcium metabolism before, during, and after a 3-mo spaceflight:  
403 kinetic and biochemical changes. *Am J Physiol* **277**, R1-10 (1999).

404 2 Greenleaf, J. E., Bulbulian, R., Bernauer, E. M., Haskell, W. L. & Moore, T. Exercise-  
405 training protocols for astronauts in microgravity. *Journal of applied physiology*  
406 (*Bethesda, Md. : 1985*) **67**, 2191-2204, doi:10.1152/jappl.1989.67.6.2191 (1989).

407 3 Vico, L. *et al.* Effects of long-term microgravity exposure on cancellous and cortical  
408 weight-bearing bones of cosmonauts. *Lancet (London, England)* **355**, 1607-1611 (2000).

409 4 Thompson, W. R., Rubin, C. T. & Rubin, J. Mechanical regulation of signaling pathways  
410 in bone. *Gene* **503**, 179-193, doi:10.1016/j.gene.2012.04.076 (2012).

411 5 Ozcivici, E. *et al.* Mechanical signals as anabolic agents in bone. *Nature reviews*.  
412 *Rheumatology* **6**, 50-59, doi:10.1038/nrrheum.2009.239 (2010).

413 6 Rando, T. A. & Ambrosio, F. Regenerative Rehabilitation: Applied Biophysics Meets  
414 Stem Cell Therapeutics. *Cell Stem Cell* **22**, 306-309, doi:10.1016/j.stem.2018.02.003  
415 (2018).



- 416 7 Chan, M. E., Uzer, G. & Rubin, C. The Potential Benefits and Inherent Risks of Vibration  
417 as a Non-Drug Therapy for the Prevention and Treatment of Osteoporosis. *Current*  
418 *osteoporosis reports*, 1-9, doi:10.1007/s11914-012-0132-1 (2013).
- 419 8 Judex, S., Gross, T. S. & Zernicke, R. F. Strain Gradients Correlate with Sites of  
420 Exercise-Induced Bone-Forming Surfaces in the Adult Skeleton. *Journal of Bone and*  
421 *Mineral Research* **12**, 1737-1745, doi:10.1359/jbmr.1997.12.10.1737 (1997).
- 422 9 Rubin, C. T. & Lanyon, L. E. Dynamic strain similarity in vertebrates; an alternative to  
423 allometric limb bone scaling. *Journal of Theoretical Biology* **107**, 321-327,  
424 doi:10.1016/s0022-5193(84)80031-4 (1984).
- 425 10 Price, C., Zhou, X. Z., Li, W. & Wang, L. Y. Real-Time Measurement of Solute Transport  
426 Within the Lacunar-Canalicular System of Mechanically Loaded Bone: Direct Evidence  
427 for Load-Induced Fluid Flow. *Journal of Bone and Mineral Research* **26**, 277-285,  
428 doi:10.1002/jbmr.211 (2011).
- 429 11 Gurkan, U. A. & Akkus, O. The Mechanical Environment of Bone Marrow: A Review.  
430 *Annals of biomedical engineering* **36**, 1978-1991, doi:10.1007/s10439-008-9577-x  
431 (2008).
- 432 12 Vainionpaa, A. *et al.* Intensity of exercise is associated with bone density change in  
433 premenopausal women. *Osteoporosis international : a journal established as result of*  
434 *cooperation between the European Foundation for Osteoporosis and the National*  
435 *Osteoporosis Foundation of the USA* **17**, 455-463, doi:10.1007/s00198-005-0005-x  
436 (2006).
- 437 13 Dickerson, D. A., Sander, E. A. & Nauman, E. A. Modeling the mechanical  
438 consequences of vibratory loading in the vertebral body: microscale effects.  
439 *Biomechanics and Modeling in Mechanobiology* **7**, 191-202, doi:10.1007/s10237-007-  
440 0085-y (2008).

- 441 14 Coughlin, T. R. & Niebur, G. L. Fluid shear stress in trabecular bone marrow due to low-  
442 magnitude high-frequency vibration. *Journal of biomechanics* **45**, 2222-2229,  
443 doi:10.1016/j.jbiomech.2012.06.020 (2012).
- 444 15 Riddle, R. C. & Donahue, H. J. From Streaming Potentials to Shear Stress: 25 Years of  
445 Bone Cell Mechanotransduction. *Journal of Orthopaedic Research* **27**, 143-149,  
446 doi:10.1002/jor.20723 (2009).
- 447 16 Fritton, S. P., McLeod, K. J. & Rubin, C. T. Quantifying the strain history of bone: spatial  
448 uniformity and self-similarity of low-magnitude strains. *Journal of biomechanics* **33**, 317-  
449 325, doi:10.1016/s0021-9290(99)00210-9 (2000).
- 450 17 Pagnotti, G. M. *et al.* Combating osteoporosis and obesity with exercise: leveraging cell  
451 mechanosensitivity. *Nature Reviews Endocrinology*, doi:10.1038/s41574-019-0170-1  
452 (2019).
- 453 18 Pongkitwitoon, S., Uzer, G., Rubin, J. & Judex, S. Cytoskeletal Configuration Modulates  
454 Mechanically Induced Changes in Mesenchymal Stem Cell Osteogenesis, Morphology,  
455 and Stiffness. *Scientific reports* **6**, 34791, doi:10.1038/srep34791 (2016).
- 456 19 Uzer, G. *et al.* Cell Mechanosensitivity to Extremely Low-Magnitude Signals Is Enabled  
457 by a LINCed Nucleus. *STEM CELLS* **33**, 2063-2076, doi:10.1002/stem.2004 (2015).
- 458 20 Uzer, G., Pongkitwitoon, S., Ete Chan, M. & Judex, S. Vibration induced osteogenic  
459 commitment of mesenchymal stem cells is enhanced by cytoskeletal remodeling but not  
460 fluid shear. *Journal of Biomechanics* **46**, 2296-2302, doi:10.1016/j.jbiomech.2013.06.008  
461 (2013).
- 462 21 Pan, J. X. *et al.* YAP promotes osteogenesis and suppresses adipogenic differentiation  
463 by regulating beta-catenin signaling. *Bone research* **6**, 18, doi:10.1038/s41413-018-  
464 0018-7 (2018).

- 465 22 Dupont, S. *et al.* Role of YAP/TAZ in mechanotransduction. *Nature* **474**, 179-183,  
466 doi:[http://www.nature.com/nature/journal/v474/n7350/abs/10.1038-nature10137-](http://www.nature.com/nature/journal/v474/n7350/abs/10.1038-nature10137-unlocked.html#supplementary-information)  
467 [unlocked.html#supplementary-information](http://www.nature.com/nature/journal/v474/n7350/abs/10.1038-nature10137-unlocked.html#supplementary-information) (2011).
- 468 23 Kegelman, C. D. *et al.* Skeletal cell YAP and TAZ combinatorially promote bone  
469 development. *FASEB journal : official publication of the Federation of American*  
470 *Societies for Experimental Biology* **32**, 2706-2721, doi:10.1096/fj.201700872R (2018).
- 471 24 Zhao, B. *et al.* TEAD mediates YAP-dependent gene induction and growth control.  
472 *Genes & development* **22**, 1962-1971, doi:10.1101/gad.1664408 (2008).
- 473 25 Benham-Pyle, B. W., Pruitt, B. L. & Nelson, W. J. Cell adhesion. Mechanical strain  
474 induces E-cadherin-dependent Yap1 and beta-catenin activation to drive cell cycle entry.  
475 *Science (New York, N. Y.)* **348**, 1024-1027, doi:10.1126/science.aaa4559 (2015).
- 476 26 Ho, L. T. Y., Skiba, N., Ullmer, C. & Rao, P. V. Lysophosphatidic Acid Induces ECM  
477 Production via Activation of the Mechanosensitive YAP/TAZ Transcriptional Pathway in  
478 Trabecular Meshwork Cells. *Investigative Ophthalmology & Visual Science* **59**, 1969-  
479 1984, doi:10.1167/iovs.17-23702 (2018).
- 480 27 Cai, H. & Xu, Y. The role of LPA and YAP signaling in long-term migration of human  
481 ovarian cancer cells. *Cell Communication and Signaling* **11**, 31, doi:10.1186/1478-811X-  
482 11-31 (2013).
- 483 28 Driscoll, Tristan P., Cosgrove, Brian D., Heo, S.-J., Shurden, Zach E. & Mauck,  
484 Robert L. Cytoskeletal to Nuclear Strain Transfer Regulates YAP Signaling in  
485 Mesenchymal Stem Cells. *Biophysical journal* **108**, 2783-2793,  
486 doi:10.1016/j.bpj.2015.05.010 (2015).
- 487 29 Janmaleki, M., Pachenari, M., Seyedpour, S. M., Shahghadami, R. & Sanati-Nezhad, A.  
488 Impact of Simulated Microgravity on Cytoskeleton and Viscoelastic Properties of  
489 Endothelial Cell. *Scientific reports* **6**, 32418, doi:10.1038/srep32418 (2016).

- 490 30 Qian, A. R. *et al.* Fractal Dimension as a Measure of Altered Actin Cytoskeleton in  
491 MC3T3-E1 Cells Under Simulated Microgravity Using 3-D/2-D Clinostats. *Biomedical*  
492 *Engineering, IEEE Transactions on* **59**, 1374-1380, doi:10.1109/TBME.2012.2187785  
493 (2012).
- 494 31 Pardo, S. J. *et al.* Simulated microgravity using the Random Positioning Machine inhibits  
495 differentiation and alters gene expression profiles of 2T3 preosteoblasts. *Am J Physiol*  
496 *Cell Physiol* **288**, doi:10.1152/ajpcell.00222.2004 (2005).
- 497 32 Dai, Z. Q., Wang, R., Ling, S. K., Wan, Y. M. & Li, Y. H. Simulated microgravity inhibits  
498 the proliferation and osteogenesis of rat bone marrow mesenchymal stem cells. *Cell*  
499 *proliferation* **40**, 671-684, doi:10.1111/j.1365-2184.2007.00461.x (2007).
- 500 33 Shi, F. *et al.* Simulated Microgravity Promotes Angiogenesis through RhoA-Dependent  
501 Rearrangement of the Actin Cytoskeleton. *Cellular physiology and biochemistry :*  
502 *international journal of experimental cellular physiology, biochemistry, and pharmacology*  
503 **41**, 227-238, doi:10.1159/000456060 (2017).
- 504 34 Corydon, T. J. *et al.* Reduced Expression of Cytoskeletal and Extracellular Matrix Genes  
505 in Human Adult Retinal Pigment Epithelium Cells Exposed to Simulated Microgravity.  
506 *Cellular physiology and biochemistry : international journal of experimental cellular*  
507 *physiology, biochemistry, and pharmacology* **40**, 1-17, doi:10.1159/000452520 (2016).
- 508 35 Chen, Z., Luo, Q., Lin, C., Kuang, D. & Song, G. Simulated microgravity inhibits  
509 osteogenic differentiation of mesenchymal stem cells via depolymerizing F-actin to  
510 impede TAZ nuclear translocation. *Scientific reports* **6**, 30322, doi:10.1038/srep30322  
511 (2016).
- 512 36 Uddin, S. M. & Qin, Y. X. Enhancement of osteogenic differentiation and proliferation in  
513 human mesenchymal stem cells by a modified low intensity ultrasound stimulation under  
514 simulated microgravity. *PLoS One* **8**, e73914, doi:10.1371/journal.pone.0073914 (2013).

- 515 37 Touchstone, H. *et al.* Recovery of stem cell proliferation by low intensity vibration under  
516 simulated microgravity requires intact LINC complex *npj. Microgravity* **5**,  
517 doi:doi.org/10.1038/s41526-019-0072-5 (2019).
- 518 38 Shiu, J.-Y., Aires, L., Lin, Z. & Vogel, V. Nanopillar force measurements reveal actin-  
519 cap-mediated YAP mechanotransduction. *Nature cell biology* **20**, 262-271,  
520 doi:10.1038/s41556-017-0030-y (2018).
- 521 39 Saeed, M. & Weihs, D. Finite element analysis reveals an important role for cell  
522 morphology in response to mechanical compression. *Biomechanics and Modeling in*  
523 *Mechanobiology*, doi:10.1007/s10237-019-01276-5 (2019).
- 524 40 Hu, J. K.-H. *et al.* An FAK-YAP-mTOR Signaling Axis Regulates Stem Cell-Based  
525 Tissue Renewal in Mice. *Cell Stem Cell* **21**, 91-106.e106,  
526 doi:10.1016/j.stem.2017.03.023 (2017).
- 527 41 Riddick, N., Ohtani, K. & Surks, H. K. Targeting by myosin phosphatase-RhoA  
528 interacting protein mediates RhoA/ROCK regulation of myosin phosphatase. *Journal of*  
529 *Cellular Biochemistry* **103**, 1158-1170, doi:10.1002/jcb.21488 (2008).
- 530 42 Sen, B. *et al.* Mechanical signal influence on mesenchymal stem cell fate is enhanced by  
531 incorporation of refractory periods into the loading regimen. *Journal of biomechanics* **44**,  
532 593-599, doi:10.1016/j.jbiomech.2010.11.022 (2011).
- 533 43 De Magistris, P. & Antonin, W. The Dynamic Nature of the Nuclear Envelope. *Current*  
534 *biology : CB* **28**, R487-r497, doi:10.1016/j.cub.2018.01.073 (2018).
- 535 44 Czapiewski, R., Robson, M. I. & Schirmer, E. C. Anchoring a Leviathan: How the  
536 Nuclear Membrane Tethers the Genome. *Frontiers in genetics* **7**, 82,  
537 doi:10.3389/fgene.2016.00082 (2016).
- 538 45 Uzer, G. *et al.* Sun-mediated mechanical LINC between nucleus and cytoskeleton  
539 regulates betacatenin nuclear access. *J Biomech* **74**, 32-40,  
540 doi:10.1016/j.jbiomech.2018.04.013 (2018).

541

542 **Figure 1. Acute LIV<sub>AT</sub> application increases nuclear YAP levels.** (a) MSCs were subjected to  
543 LIV<sub>AT</sub> and stained with DAPI (blue) and YAP (red). Confocal images indicated an increased  
544 nuclear YAP levels following acute LIV<sub>AT</sub> applied as five 20min vibration periods separated by  
545 1hr. (b) Quantitative analysis of confocal images showed a 32% of increase of nuclear YAP in  
546 LIV<sub>AT</sub> samples compared to controls. n>400/grp, group comparison was made a Mann-Whitney  
547 U-test, \*p<0.05, \*\*p<0.01, \*\*\*p<0.01, \*\*\*\*p<0.0001.

548

549 **Figure 2. Basal nuclear YAP levels decreased by SMG were rescued by LIV<sub>DT</sub>.** (a) MSCs  
550 were subjected to SMG, and SMG+LIV<sub>DT</sub> over 72h period and stained with DAPI (blue) and YAP  
551 (red). (b) Quantitative analysis showed a 42% decrease of nuclear YAP levels in the SMG group  
552 compared to control levels. The SMG+LIV<sub>DT</sub> group showed a 67% increase of nuclear YAP  
553 when compared to the SMG group. There was no statistically significant difference between  
554 CTRL and SMG+LIV<sub>DT</sub> groups. n>100/grp. Group comparisons were made via Kruskal-Wallis  
555 test followed by Tukey multiple comparison, \*p<0.05, \*\*p<0.01, \*\*\*p<0.01, \*\*\*\*p<0.0001.

556

557 **Figure 3. Experimental design of combined SMG, LIV<sub>AT</sub> and LIV<sub>DT</sub> application.** MSCs were  
558 subcultured and plated in SlideFlasks and allowed to attach for 24h before SlideFlasks were  
559 filled with culture medium and sealed. Treatment regimen for MSC's involved 72h of SMG  
560 (blue). LIV<sub>DT</sub> regimen consisted of one treatment cycle every 24hr during SMG treatment with  
561 each cycle consisting of 2x 20min LIV with an hour in between (yellow). LIV<sub>AT</sub> regimen was  
562 applied after 72h SMG treatment period and consisted of 5x 20min LIV with an hour in between  
563 each (red). For LIV application, MSCs plated in SlideFlasks were placed in LIV device  
564 constructed in the lab previous to this research. Vibrations were applied at peak magnitudes of  
565 0.7 g at 90 Hz at room temperature. Control samples were treated the same but were not  
566 vibrated. For SMG application, MSCs plated in SlideFlasks were secured in lab custom-built

567 clinostat inside incubator. The clinostat subjected the MSCs to constant 15 RPM rotation  
568 simulated microgravity. After treatment, flasks were removed for immunofluorescence staining.  
569

570 **Figure 4. LIV<sub>AT</sub>-induced YAP nuclear entry decreased by SMG was not restored by daily**  
571 **LIV<sub>DT</sub> application.** MSCs were subjected to either CTRL, SMG, SMG+LIV<sub>DT</sub> over 72h period  
572 were subsequently treated with LIV<sub>AT</sub>. Quantitative analysis of confocal images showed that  
573 SMG alone decreased basal nuclear YAP levels by 37% which were increased back to control  
574 levels in the SMG+LIV<sub>DT</sub> group. +LIV<sub>AT</sub> increased nuclear YAP levels in the CTRL, SMG and  
575 SMG+LIV<sub>DT</sub> groups by 50%, 69% and 22%, respectively. Nuclear YAP intensity in the  
576 SMG+LIV<sub>DT</sub>+LIV<sub>AT</sub> group remained not significantly different from the SMG+LIV<sub>AT</sub> and 23%  
577 smaller than the LIV<sub>AT</sub> group. n>200/grp. Group comparisons were made via Kruskal-Wallis test  
578 followed by Tukey multiple comparison, \*p<0.05, \*\*p<0.01, \*\*\*p<0.01, \*\*\*\*p<0.0001.

579  
580 **Figure 5. LPA treatment increases nuclear YAP levels.** (a) Representative confocal images  
581 of DAPI (blue) and YAP (red) stained MSCs with or without LPA treatment. MSCs were  
582 subjected to LPA addition at 50µM and 100µM concentrations. (b) Quantitative analysis of  
583 confocal images revealed a 99% and a 107% increase in the 50µM LPA and 100µM LPA  
584 treatments compared to DMSO treated controls, respectively. Nuclear YAP levels for 50µM LPA  
585 and 100µM LPA treatments were not significantly different. n>30/grp. Group comparisons were  
586 made via Kruskal-Wallis test followed by Tukey multiple comparison, \*p<0.05, \*\*p<0.01,  
587 \*\*\*p<0.01, \*\*\*\*p<0.0001.

588  
589 **Figure 6. LPA-induced YAP nuclear entry decreased by SMG was alleviated by daily LIV<sub>DT</sub>**  
590 **application.** MSCs were subjected to SMG, and parallel SMG+LIV<sub>DT</sub> over 72h period at the end  
591 of 72h, samples were treated with either LPA (50µM) or DMSO. Quantitative analysis of  
592 confocal images revealed that LPA addition increased nuclear YAP levels by 105%, 67% and



593 43% in the CTRL, SMG and SMG+LIV<sub>DT</sub> when compared to DMSO controls. When compared to  
594 nuclear YAP intensity of the LPA treatment alone, SMG+LPA and SMG+LIV<sub>DT</sub>+LPA samples  
595 were 55% and 29% lower, respectively. YAP nuclear levels in SMG+LIV<sub>DT</sub>+LPA remained 70%  
596 higher than SMG+LPA group. n>100/grp. Group comparisons were made via Kruskal-Wallis test  
597 followed by Tukey multiple comparison, \*p<0.05, \*\*p<0.01, \*\*\*p<0.01, \*\*\*\*p<0.0001.

598

599 **Figure 7. MSC stiffness and structure remain intact under SMG and SMG+LIV<sub>DT</sub>**

600 **treatments.** MSCs were subjected to SMG and parallel SMG+LIV<sub>DT</sub> over a 72h period. (a)

601 Compared to CTRL samples, AFM measurement of the elastic moduli of SMG and SMG+LIV<sub>DT</sub>  
602 treated MSCs revealed apparent decreases in elastic modules that were 21% and 27% below  
603 control levels, measured differences were not statistically significant. n=10/grp. (b)

604 Quantification of confocal images show that, (c) mean F-actin intensity of SMG and SMG+LIV<sub>DT</sub>  
605 treated MSCs revealed decrease of 36% and 30% below control levels, measured differences  
606 were not statistically significant. n=15/grp. (d) No significant effects of either SMG or LIV<sub>DT</sub>

607 treatment on the average nucleus size were found. n>100/grp. Group comparisons were made  
608 via Kruskal-Wallis test followed by Tukey multiple comparison, \*p<0.05, \*\*p<0.01, \*\*\*p<0.01,  
609 \*\*\*\*p<0.0001.

610

611 **Figure S1. LIV<sub>AT</sub> treatment increases nuclear YAP in C2C12 cells.** (a) C2C12 cells were

612 subjected to LIV<sub>AT</sub> and stained with DAPI (blue) and YAP (red). Confocal images displayed  
613 increased nuclear YAP levels following LIV<sub>AT</sub> treatment. (b) Quantitative analysis of confocal  
614 images showed a 40% increase of nuclear YAP in LIV<sub>AT</sub> samples compared to controls.

615 n>900/grp, group comparison was made using a Mann-Whitney U-test, \*p<0.05, \*\*p<0.01,  
616 \*\*\*p<0.01, \*\*\*\*p<0.0001.

617



618 **Figure S2. LINC complex disruption decreases nuclear YAP levels and reduces LIV<sub>AT</sub>-**  
619 **induced YAP nuclear entry.** (a) Plasmids harboring either a dominant negative KASH domain  
620 of Nesprin (DNK) to disable LINC complex function or empty mCherry control (MC) were  
621 overexpressed in MSCs. Following puromycin selection, MC or DNK expressing MSCs were  
622 subjected to LIV<sub>AT</sub> and stained against DAPI (blue) and YAP (red). (b) Quantitative analysis of  
623 confocal images revealed a 49% increase of nuclear YAP following LIV<sub>AT</sub> in MC expressing  
624 control MSCs. Basal YAP levels of the DNK-CTRL group were 34% lower compared to MC-  
625 CTRL and LIV<sub>AT</sub> treatment failed to significantly increase nuclear YAP over DNK-CTRL (18%,  
626 NS). n>30/grp, group comparisons were made via Kruskal-Wallis test followed by Tukey  
627 multiple comparison, \*p<0.05, \*\*p<0.01, \*\*\*p<0.01, \*\*\*\*p<0.0001.

628  
629 **Figure S3. Blocking FAK phosphorylation at Tyr 397 does not limit LIV<sub>AT</sub> induced YAP**  
630 **nuclear entry.** Dimethyl sulphoxide (DMSO) or Tyr 397 specific FAK inhibitor (FAKi) PF573228  
631 (3µM) was added to MSCs in culture medium for 1h prior to LIV<sub>AT</sub> or control treatments. (a)  
632 Confocal images of YAP showed more intense nuclear YAP staining of LIV<sub>AT</sub> treated MSCs but  
633 no apparent effect of FAKi when compared to DMSO (b) FAKi application 1hr prior to LIV<sub>AT</sub>  
634 treatment inhibited the LIV<sub>AT</sub> induced FAK phosphorylation at Tyr 397 and decreased the basal  
635 levels (c) Quantitative analysis of confocal images revealed a 61% increase of nuclear YAP in  
636 both the DMSO-LIV group and a 60% increase in the FAKi-LIV<sub>AT</sub> group compared to the DMSO-  
637 CTRL group. Differences between the DMSO-CTRL and FAKi-CTRL groups and between the  
638 DMSO-LIV and FAKi-LIV<sub>AT</sub> groups were not significant. n>50/grp. Group comparisons were  
639 made via Kruskal-Wallis test followed by Tukey multiple comparison, \*p<0.05, \*\*p<0.01,  
640 \*\*\*p<0.01, \*\*\*\*p<0.0001.

641  
642 **Figure S4.** Confocal images for SMG/LIV<sub>DT</sub>/LIV<sub>AT</sub> treatments in Figure 4.

643

644 **Figure S5.** Confocal images for SMG/LIV<sub>DT</sub>/LPA treatment in Figure 6.

645

646 **Figure S6.** Unprocessed blots used in Figure S3 as obtained by LiCor C-DiGit blot scanner.

647

648 **Table S1:** Cell culture and pharmacological reagents and their final concentrations.

| Cell Culture and Pharmacological Reagents |                      | Final Concentration |
|-------------------------------------------|----------------------|---------------------|
| IMDM                                      | GIBCO                | -                   |
| DMEM                                      | Caisson Laboratories | -                   |
| FCS                                       | Atlanta Biologicals  | 10% v/v             |
| Penicillin/streptomycin                   | GIBCO                | 1% v/v              |

649

650 **Table S2:** Antibodies used and their final concentrations for western blots.

| Antibodies          |                           | Final Concentration |
|---------------------|---------------------------|---------------------|
| p-FAK Tyr397 (3283) | Cell Signaling            | 1/1000              |
| FAK (sc-558)        | Santa Cruz Biotechnology  | 1/500               |
| LDHA (2012S)        | Cell Signaling Technology | 1/1000              |

651

652 **Table S3:** Immunostaining antibodies and reagents and their final concentrations.

| Immunostaining antibodies and Reagents |                           | Final Concentration |
|----------------------------------------|---------------------------|---------------------|
| DAPI (H-1500-10)                       | Vector Laboratories       | 1 µg/mL             |
| Alexa Fluor 488 Phalloidin             | Life Technologies         | 0.1 µM              |
| YAP (14074S)                           | Cell Signaling Technology | 1/100               |

653

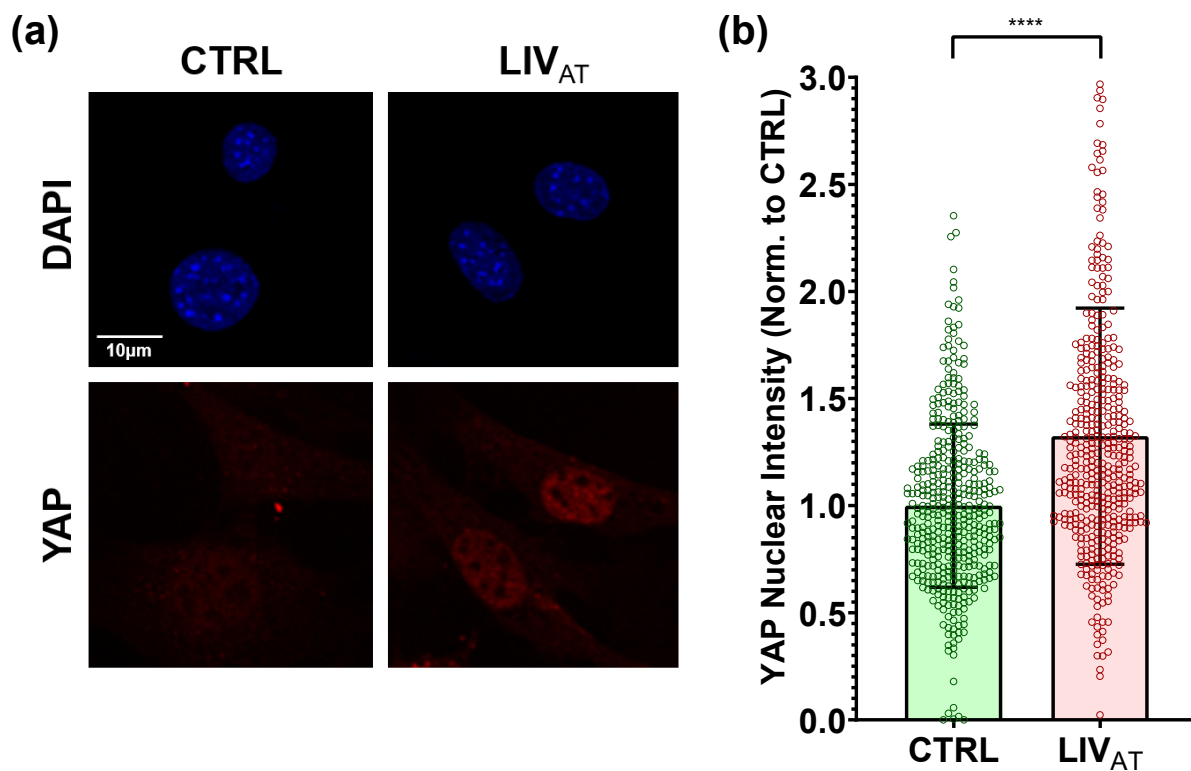

**Figure 1. Acute LIV<sub>AT</sub> application increases nuclear YAP levels.** (a) MSCs were subjected to LIV<sub>AT</sub> and stained with DAPI (blue) and YAP (red). Confocal images indicated an increased nuclear YAP levels following acute LIV<sub>AT</sub> applied as five 20min vibration periods separated by 1hr. (b) Quantitative analysis of confocal images showed a 32% of increase of nuclear YAP in LIV<sub>AT</sub> samples compared to controls. n>400/grp, group comparison was made a Mann-Whitney U-test, \*p<0.05, \*\*p<0.01, \*\*\*p<0.01, \*\*\*\*p<0.0001

## Figure 2

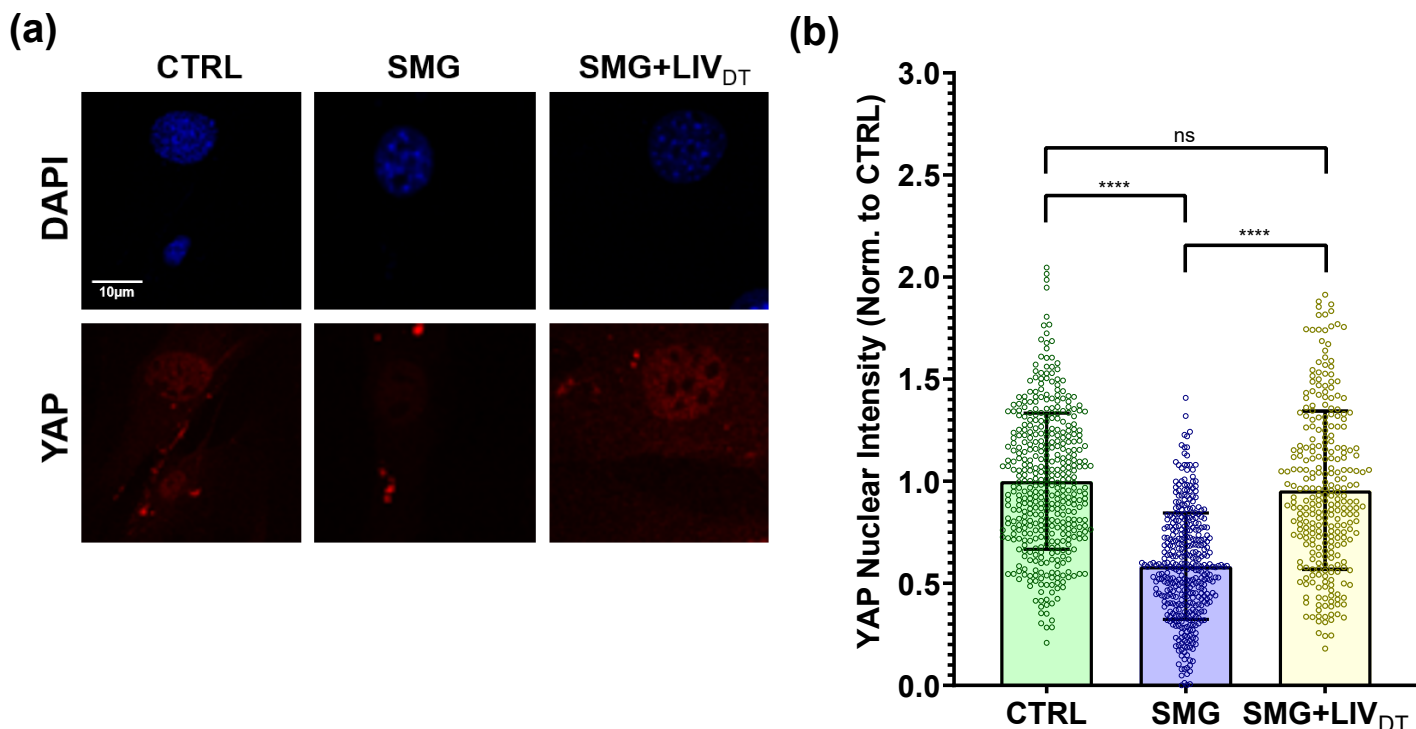

**Figure 2. Basal nuclear YAP levels decreased by SMG were rescued by LIV<sub>DT</sub>.** (a) MSCs were subjected to SMG, and SMG+LIV<sub>DT</sub> over 72h period and stained with DAPI (blue) and YAP (red). (b) Quantitative analysis showed a 42% decrease of nuclear YAP levels in the SMG group compared to control levels. The SMG+LIV<sub>DT</sub> group showed a 67% increase of nuclear YAP when compared to the SMG group. There was no statistically significant difference between CTRL and SMG+LIV<sub>DT</sub> groups. n>100/grp. Group comparisons were made via Kruskal-Wallis test followed by Tukey multiple comparison, \*p<0.05, \*\*p<0.01, \*\*\*p<0.01, \*\*\*\*p<0.0001.

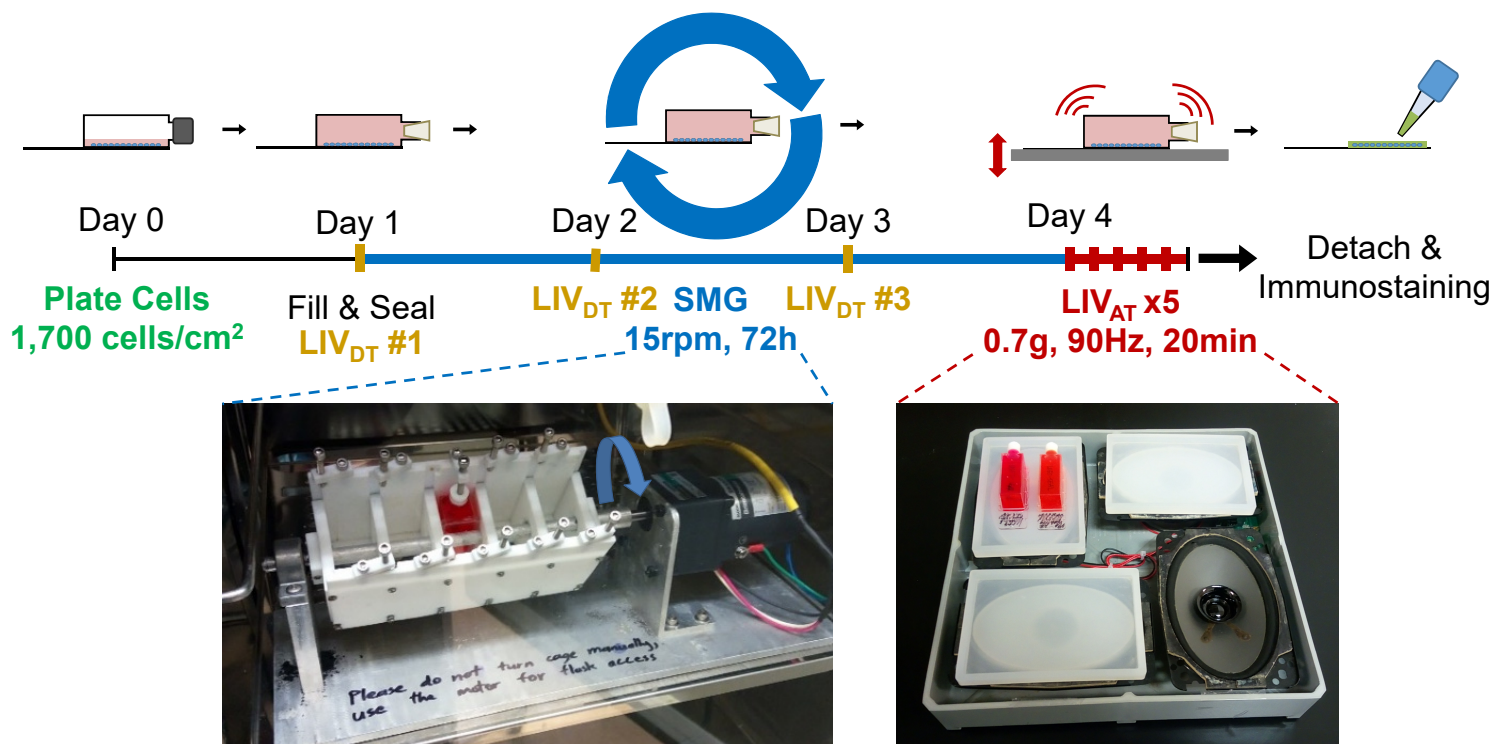

### Figure 3. Experimental design of combined SMG, LIV<sub>AT</sub> and LIV<sub>DT</sub> application.

MSCs were subcultured and plated in SlideFlasks and allowed to attach for 24h before SlideFlasks were filled with culture medium and sealed. Treatment regimen for MSC's involved 72h of SMG (blue). LIV<sub>DT</sub> regimen consisted of one treatment cycle every 24hr during SMG treatment with each cycle consisting of 2x 20min LIV with an hour in between (yellow). LIV<sub>AT</sub> regimen was applied after 72h SMG treatment period and consisted of 5x 20min LIV with an hour in between each (red). For LIV application, MSCs plated in SlideFlasks were placed in LIV device constructed in the lab previous to this research. Vibrations were applied at peak magnitudes of 0.7 g at 90 Hz at room temperature. Control samples were treated the same but were not vibrated. For SMG application, MSCs plated in SlideFlasks were secured in lab custom-built clinostat inside incubator. The clinostat subjected the MSCs to constant 15 RPM rotation simulated microgravity. After treatment, flasks were removed for immunofluorescence staining.

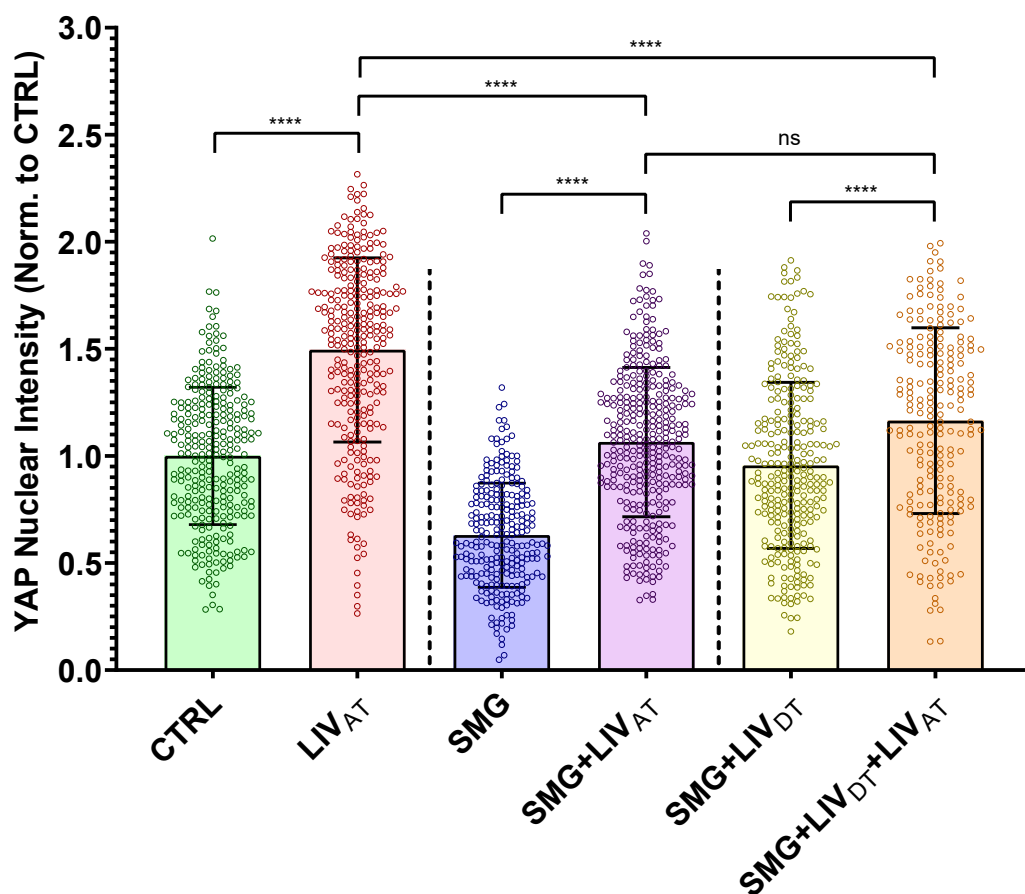

**Figure 4. LIV<sub>AT</sub>-induced YAP nuclear entry decreased by SMG was not restored by daily LIV<sub>DT</sub> application.** MSCs were subjected to either CTRL, SMG, SMG+LIV<sub>DT</sub> over 72h period were subsequently treated with LIV<sub>AT</sub>. Quantitative analysis of confocal images showed that SMG alone decreased basal nuclear YAP levels by 37% which were increased back to control levels in the SMG+LIV<sub>DT</sub> group. +LIV<sub>AT</sub> increased nuclear YAP levels in the CTRL, SMG and SMG+LIV<sub>DT</sub> groups by 50%, 69% and 22%, respectively. Nuclear YAP intensity in the SMG+LIV<sub>DT</sub>+LIV<sub>AT</sub> group remained not significantly different from the SMG+LIV<sub>AT</sub> and 23% smaller than the LIV<sub>AT</sub> group. n>200/grp. Group comparisons were made via Kruskal-Wallis test followed by Tukey multiple comparison, \*p<0.05, \*\*p<0.01, \*\*\*p<0.01, \*\*\*\*p<0.0001.

## Figure 5

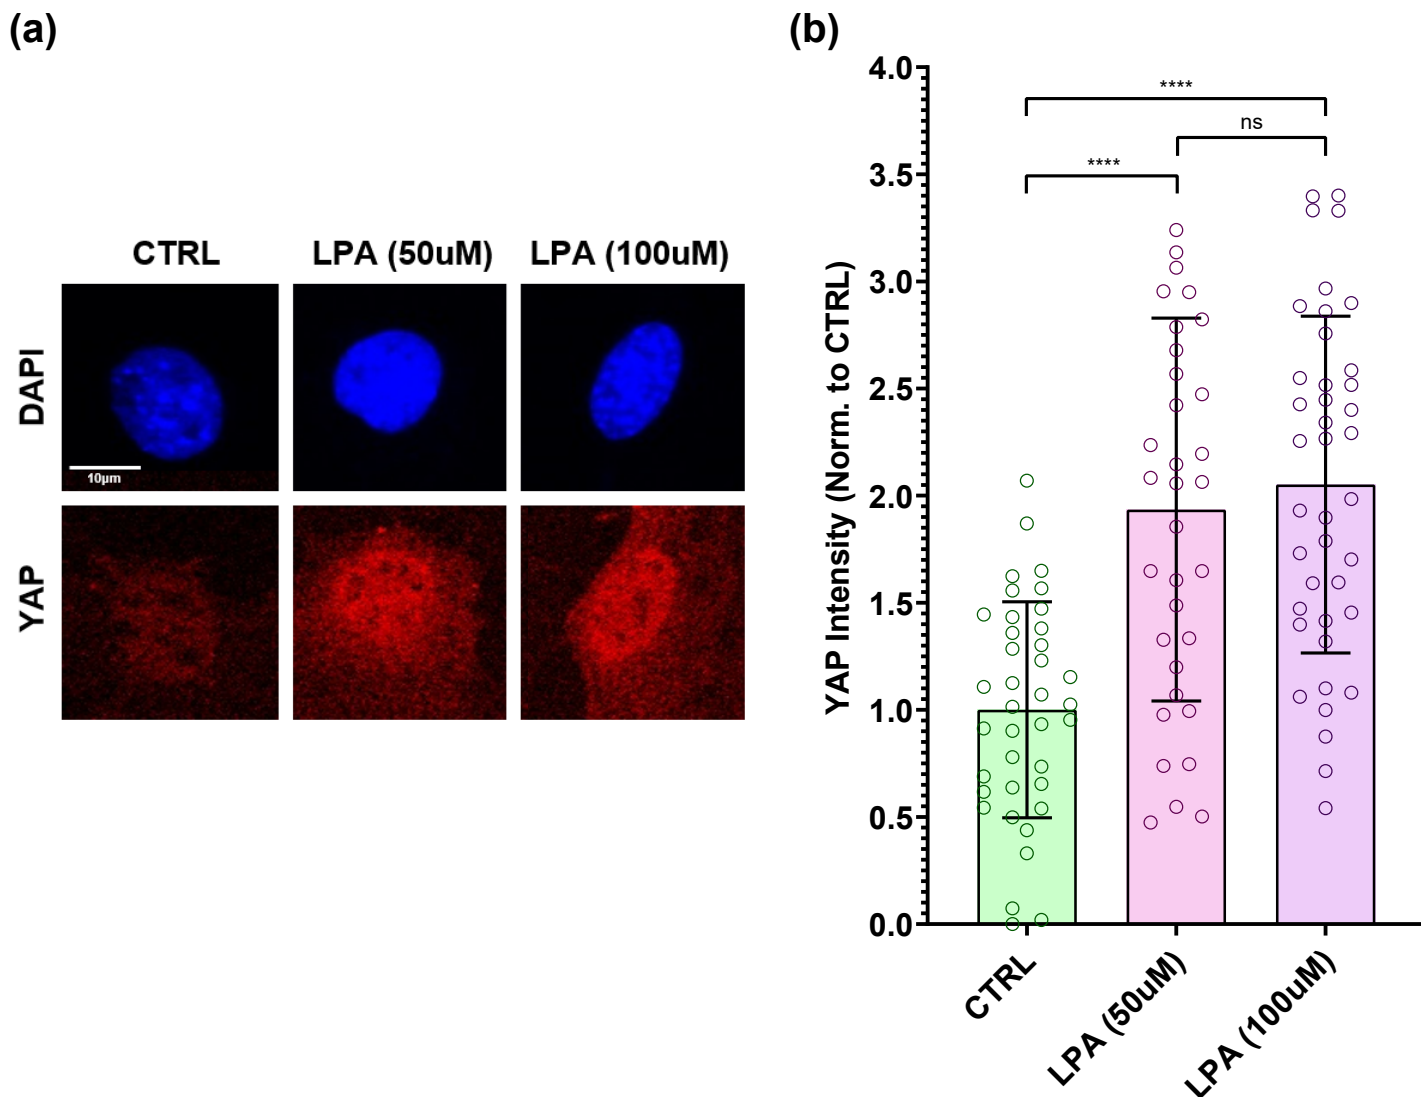

**Figure 5. LPA treatment increases nuclear YAP levels.** (a) Representative confocal images of DAPI (blue) and YAP (red) stained MSCs with or without LPA treatment. MSCs were subjected to LPA addition at 50µM and 100µM concentrations. (b) Quantitative analysis of confocal images revealed a 99% and a 107% increase in the 50µM LPA and 100µM LPA treatments compared to DMSO treated controls, respectively. Nuclear YAP levels for 50µM LPA and 100µM LPA treatments were not significantly different.  $n > 30/\text{grp}$ . Group comparisons were made via Kruskal-Wallis test followed by Tukey multiple comparison, \* $p < 0.05$ , \*\* $p < 0.01$ , \*\*\* $p < 0.001$ , \*\*\*\* $p < 0.0001$ .



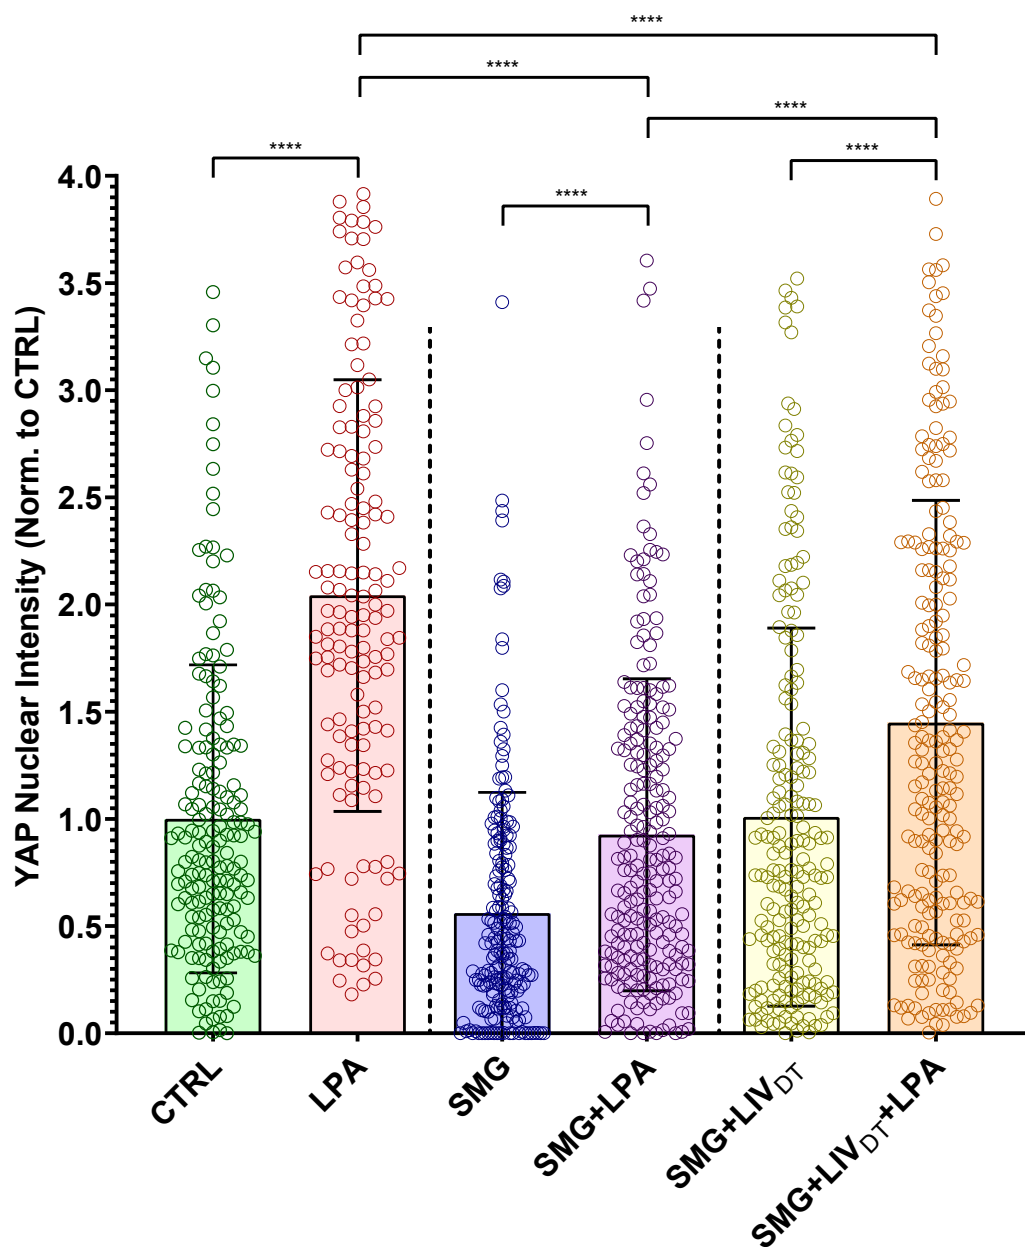

**Figure 6. LPA-induced YAP nuclear entry decreased by SMG was alleviated by daily LIV<sub>DT</sub> application.** MSCs were subjected to SMG, and parallel SMG+LIV<sub>DT</sub> over 72h period at the end of 72h, samples were treated with either LPA (50μM) or DMSO. Quantitative analysis of confocal images revealed that LPA addition increased nuclear YAP levels by 105%, 67% and 43% in the CTRL, SMG and SMG+LIV<sub>DT</sub> when compared to DMSO controls. When compared to nuclear YAP intensity of the LPA treatment alone, SMG+LPA and SMG+LIV<sub>DT</sub>+LPA samples were 55% and 29% lower, respectively. YAP nuclear levels in SMG+LIV<sub>DT</sub>+LPA remained 70% higher than SMG+LPA group. n>100/grp. Group comparisons were made via Kruskal-Wallis test followed by Tukey multiple comparison, \*p<0.05, \*\*p<0.01, \*\*\*p<0.01, \*\*\*\*p<0.0001.



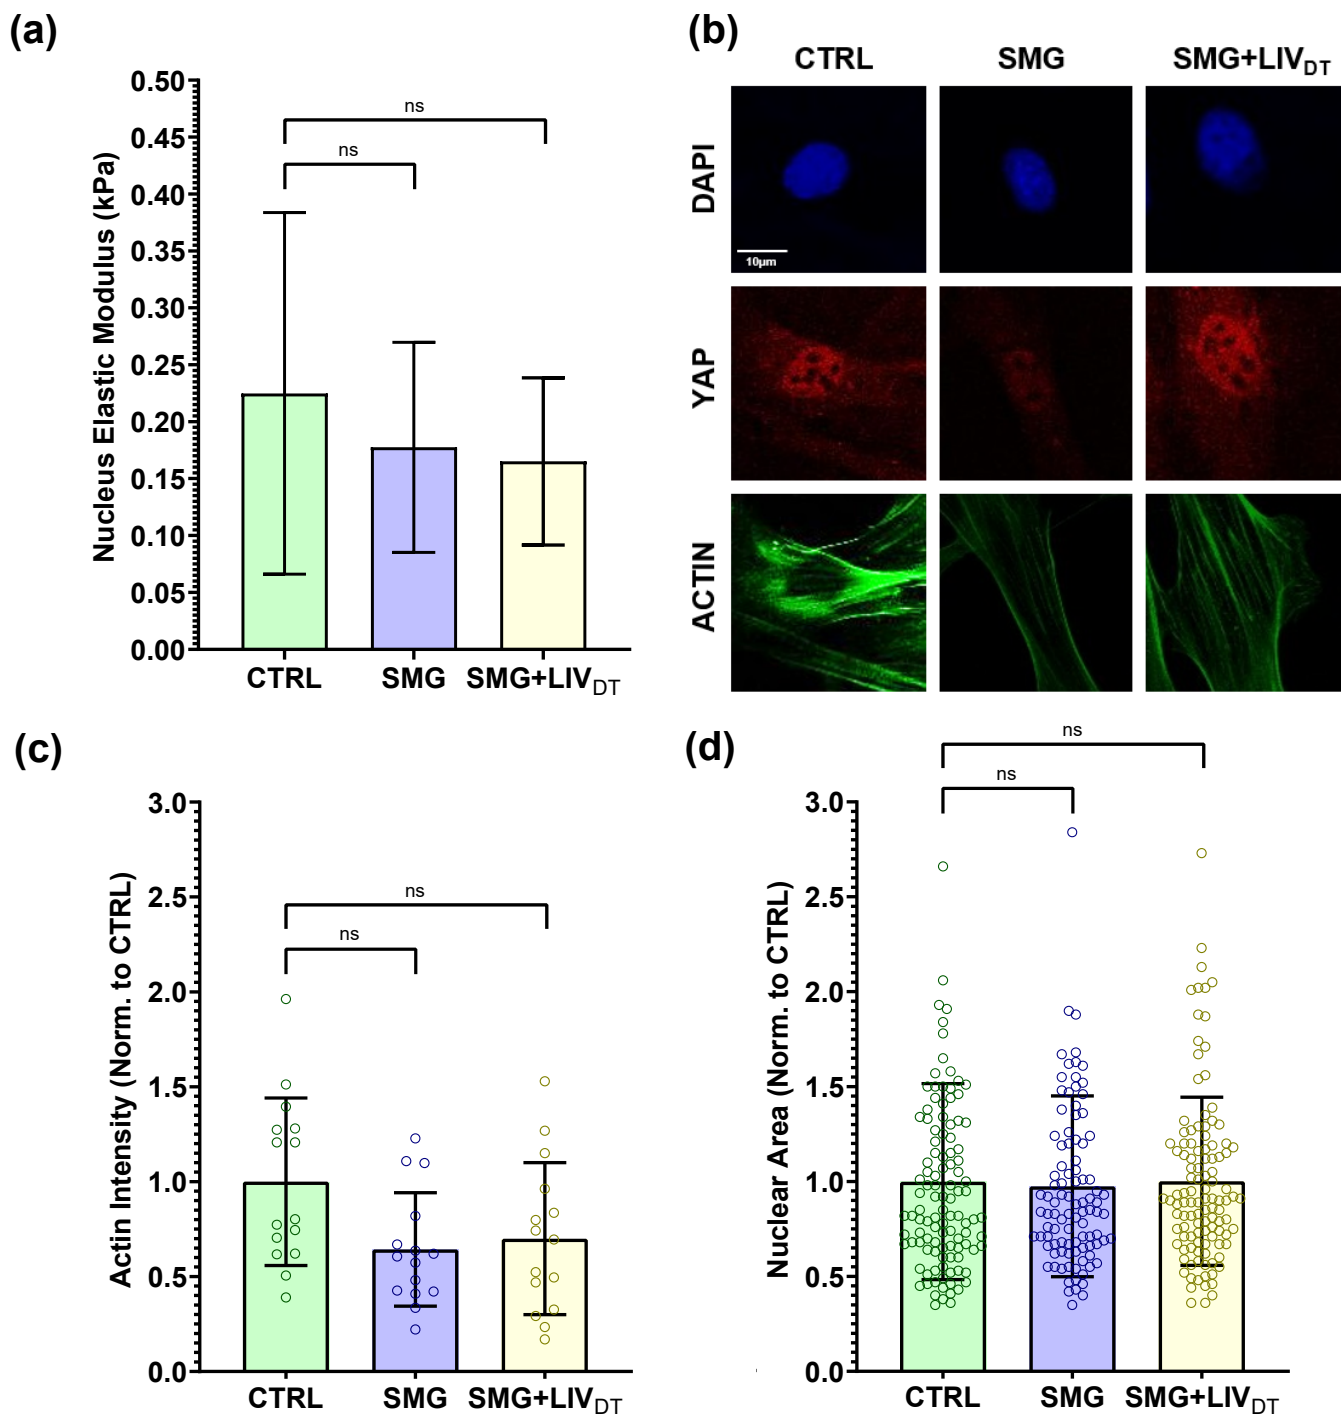

**Figure 7. MSC stiffness and structure remain intact under SMG and SMG+LIV<sub>DT</sub> treatments.** MSCs were subjected to SMG and parallel SMG+LIV<sub>DT</sub> over a 72h period. (a) Compared to CTRL samples, AFM measurement of the elastic moduli of SMG and SMG+LIV<sub>DT</sub> treated MSCs revealed apparent decreases in elastic modules that were 21% and 27% below control levels, measured differences were not statistically significant. n=10/grp. (b) Quantification of confocal images show that, (c) mean F-actin intensity of SMG and SMG+LIV<sub>DT</sub> treated MSCs revealed decrease of 36% and 30% below control levels, measured differences were not statistically significant. n=15/grp. (d) No significant effects of either SMG or LIV<sub>DT</sub> treatment on the average nucleus size were found. n>100/grp. Group comparisons were made via Kruskal-Wallis test followed by Tukey multiple comparison, \*p<0.05, \*\*p<0.01, \*\*\*p<0.01, \*\*\*\*p<0.0001.

# Supplementary Information

## Low Intensity Vibrations Restore Nuclear YAP Levels and Acute YAP Nuclear Shuttling in Mesenchymal Stem Cells Subjected to Simulated Microgravity

Thompson M<sup>1</sup>, Woods K<sup>2</sup>, Newberg, J<sup>1</sup>, Oxford JT, Uzer G<sup>1†</sup>

<sup>1</sup>Mechanical and Biomedical Engineering, Boise State University

<sup>2</sup>Biomolecular Sciences Graduate Program, Boise State University

† **Corresponding Author**

### Funding support:

NASA ISGC NNX15AI04H, NIH R01AG059923, and 5P2CHD086843-03, P20GM109095, P20GM103408 and NSF 1929188.

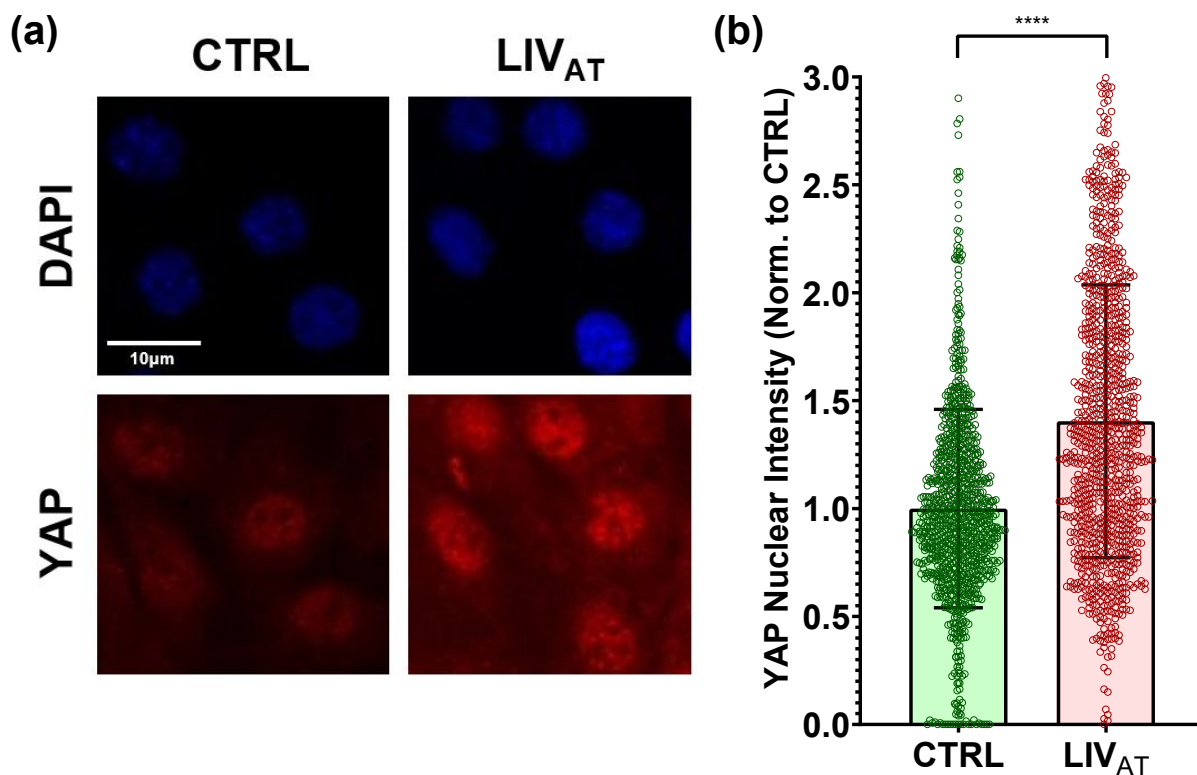

**Figure S1. LIV<sub>AT</sub> treatment increases nuclear YAP in C2C12 cells.** (a) C2C12 cells were subjected to LIV<sub>AT</sub> and stained with DAPI (blue) and YAP (red). Confocal images displayed increased nuclear YAP levels following LIV<sub>AT</sub> treatment. (b) Quantitative analysis of confocal images showed a 40% increase of nuclear YAP in LIV<sub>AT</sub> samples compared to controls. n>900/grp, group comparison was made using a Mann-Whitney U-test, \*p<0.05, \*\*p<0.01, \*\*\*p<0.01, \*\*\*\*p<0.0001.

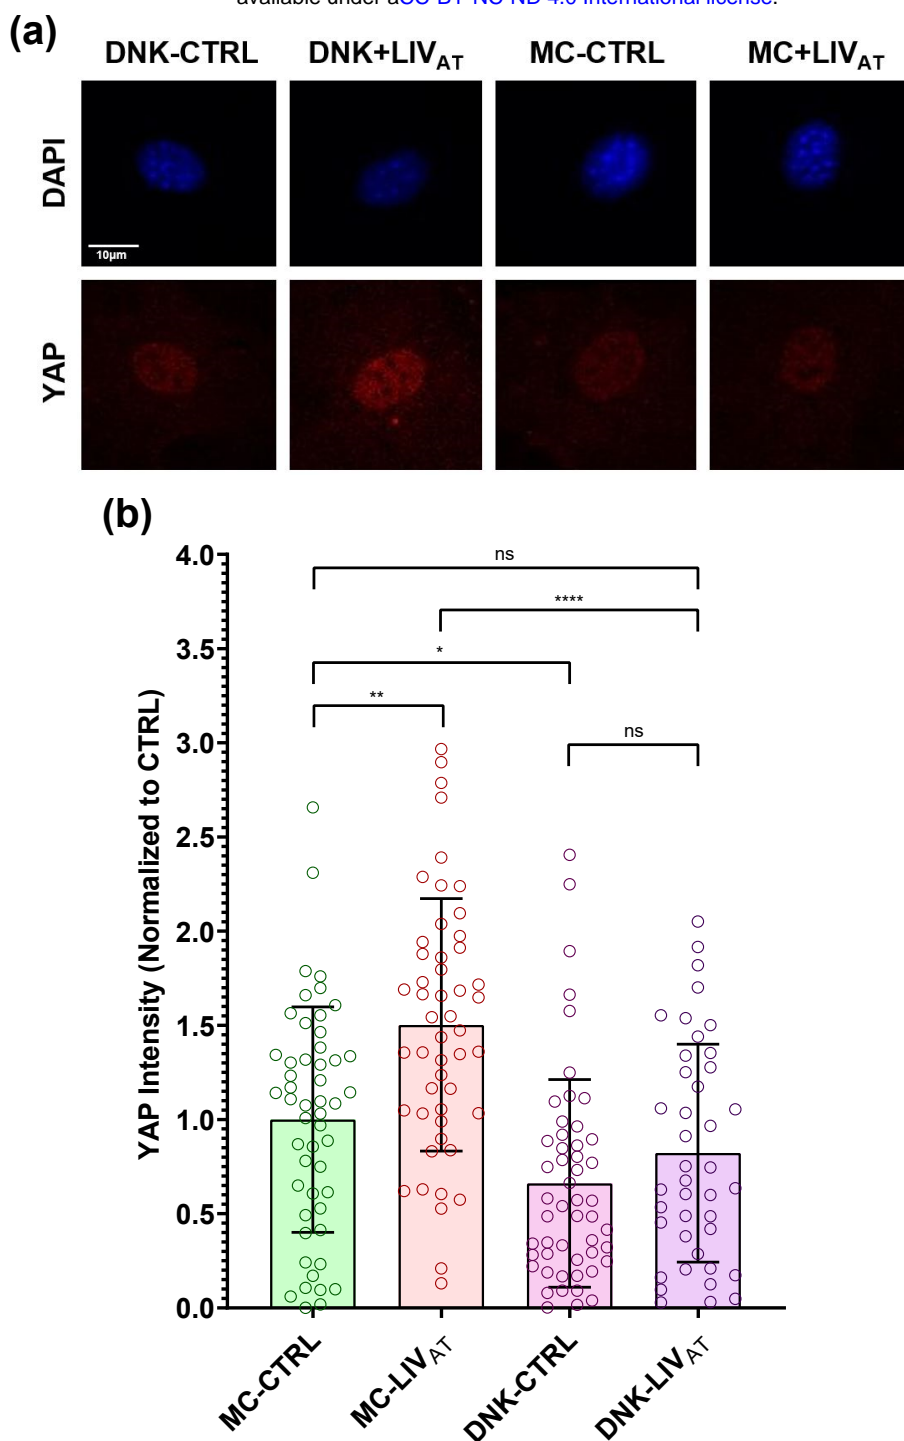

**Figure S2. LINC complex disruption decreases nuclear YAP levels and reduces LIV<sub>AT</sub>-induced YAP nuclear entry.** (a) Plasmids harboring either a dominant negative KASH domain of Nesprin (DNK) to disable LINC complex function or empty mCherry control (MC) were overexpressed in MSCs. Following puromycin selection, MC or DNK expressing MSCs were subjected to LIV<sub>AT</sub> and stained against DAPI (blue) and YAP (red). (b) Quantitative analysis of confocal images revealed a 49% increase of nuclear YAP following LIV<sub>AT</sub> in MC expressing control MSCs. Basal YAP levels of the DNK-CTRL group were 34% lower compared to MC-CTRL and LIV<sub>AT</sub> treatment failed to significantly increase nuclear YAP over DNK-CTRL (18%, NS). n>30/grp, group comparisons were made via Kruskal-Wallis test followed by Tukey multiple comparison, \*p<0.05, \*\*p<0.01, \*\*\*p<0.001, \*\*\*\*p<0.0001.

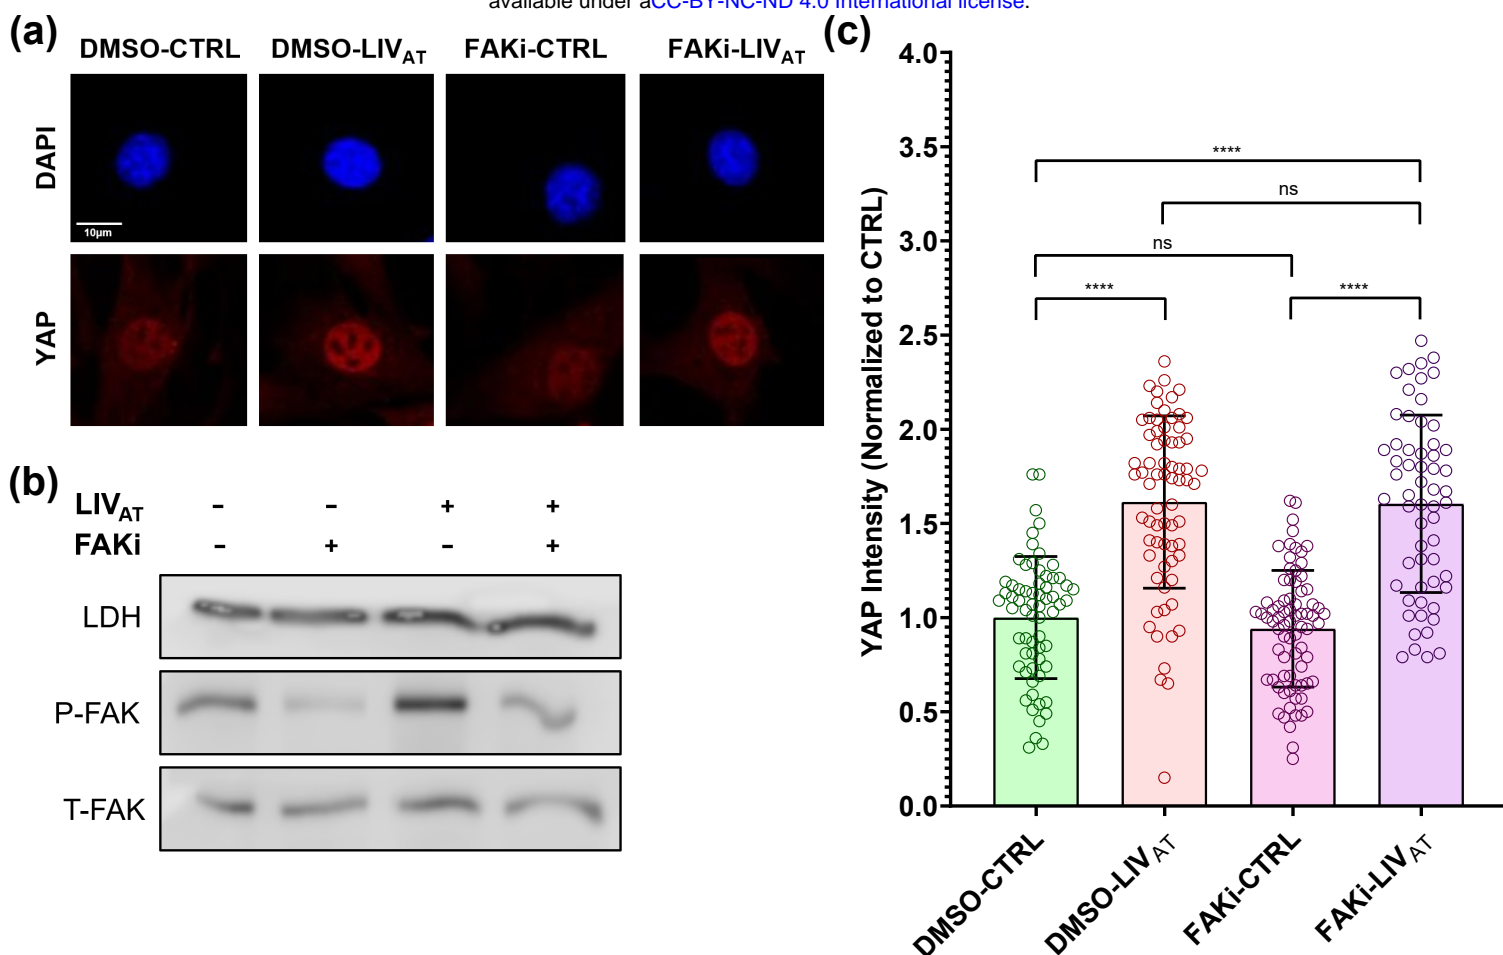

**Figure S3. Blocking FAK phosphorylation at Tyr 397 does not limit LIV<sub>AT</sub> induced YAP nuclear entry.** Dimethyl sulphoxide (DMSO) or Tyr 397 specific FAK inhibitor (FAKi) PF573228 (3 μM) was added to MSCs in culture medium for 1h prior to LIV<sub>AT</sub> or control treatments. (a) Confocal images of YAP showed more intense nuclear YAP staining of LIV<sub>AT</sub> treated MSCs but no apparent effect of FAKi when compared to DMSO (b) FAKi application 1hr prior to LIV<sub>AT</sub> treatment inhibited the LIV<sub>AT</sub> induced FAK phosphorylation at Tyr 397 and decreased the basal levels (c) Quantitative analysis of confocal images revealed a 61% increase of nuclear YAP in both the DMSO-LIV group and a 60% increase in the FAKi-LIV<sub>AT</sub> group compared to the DMSO-CTRL group. Differences between the DMSO-CTRL and FAKi-CTRL groups and between the DMSO-LIV and FAKi-LIV<sub>AT</sub> groups were not significant. n>50/grp. Group comparisons were made via Kruskal-Wallis test followed by Tukey multiple comparison, \*p<0.05, \*\*p<0.01, \*\*\*p<0.01, \*\*\*\*p<0.0001.

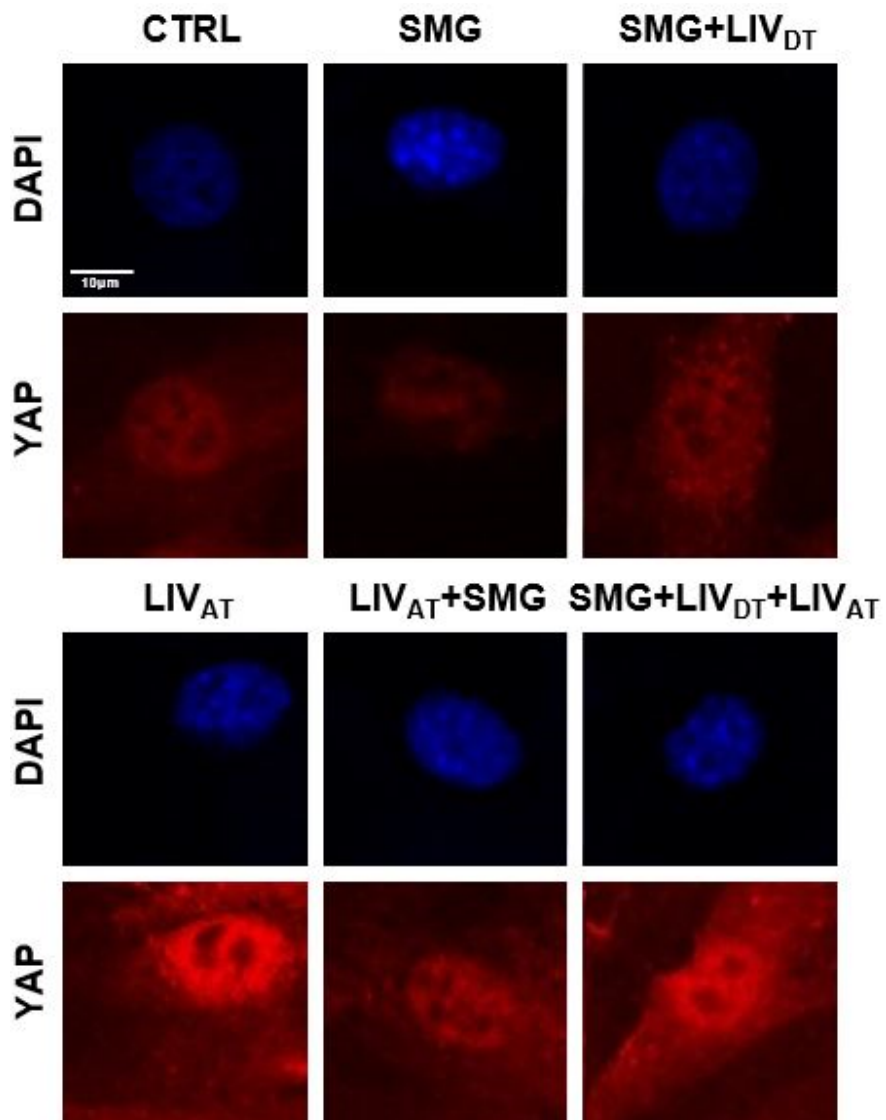

**Figure S4.** Confocal images for SMG/LIV<sub>DT</sub>/LIV<sub>AT</sub> treatments in Figure 4.

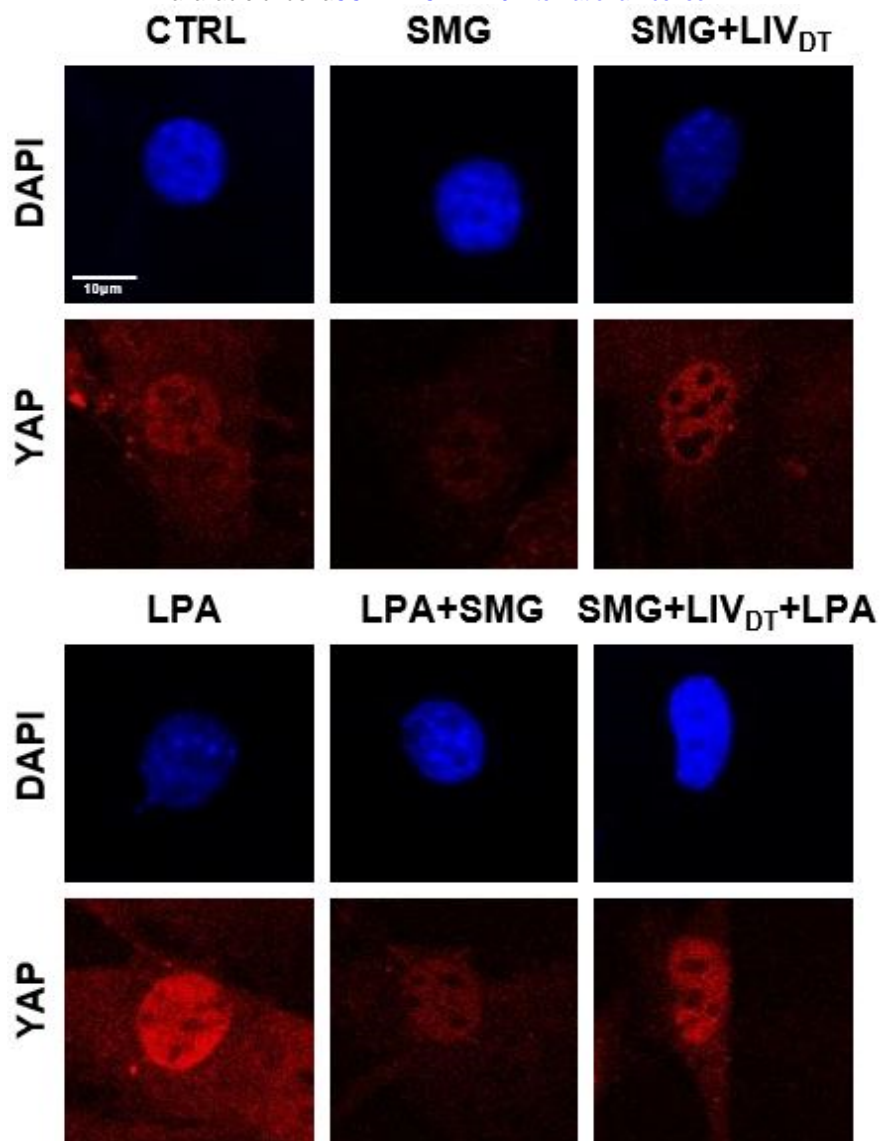

**Figure S5.** Confocal images for SMG/LIV<sub>DT</sub>/LPA treatment in Figure 6.



**Table S1: Cell culture and pharmacological reagents and their final concentrations.**

| Cell culture and pharmacological reagents |                      | Final Concentration |
|-------------------------------------------|----------------------|---------------------|
| IMDM                                      | GIBCO                | -                   |
| DMEM                                      | Caisson Laboratories | -                   |
| FCS                                       | Atlanta Biologicals  | 10% v/v             |
| Penicillin/streptomycin                   | GIBCO                | 1% v/v              |

**Table S2: Antibodies used and their final concentrations for western blots.**

| Antibodies          |                           | Final Concentration |
|---------------------|---------------------------|---------------------|
| p-FAK Tyr397 (3283) | Cell Signaling Technology | 1/1000              |
| FAK (sc-558)        | Santa Cruz Biotechnology  | 1/500               |
| LDHA (2012S)        | Cell Signaling Technology | 1/1000              |

**Table S3: Immunostaining antibodies and reagents and their final concentrations.**

| Immunostaining antibodies and reagents |                           | Final Concentration |
|----------------------------------------|---------------------------|---------------------|
| DAPI (H-1500-10)                       | Vector Laboratories       | 1 µg/mL             |
| Alexa Fluor 488 Phalloidin             | Life Technologies         | 0.1 µM              |
| YAP (14074S)                           | Cell Signaling Technology | 1/100               |



## Figure S6

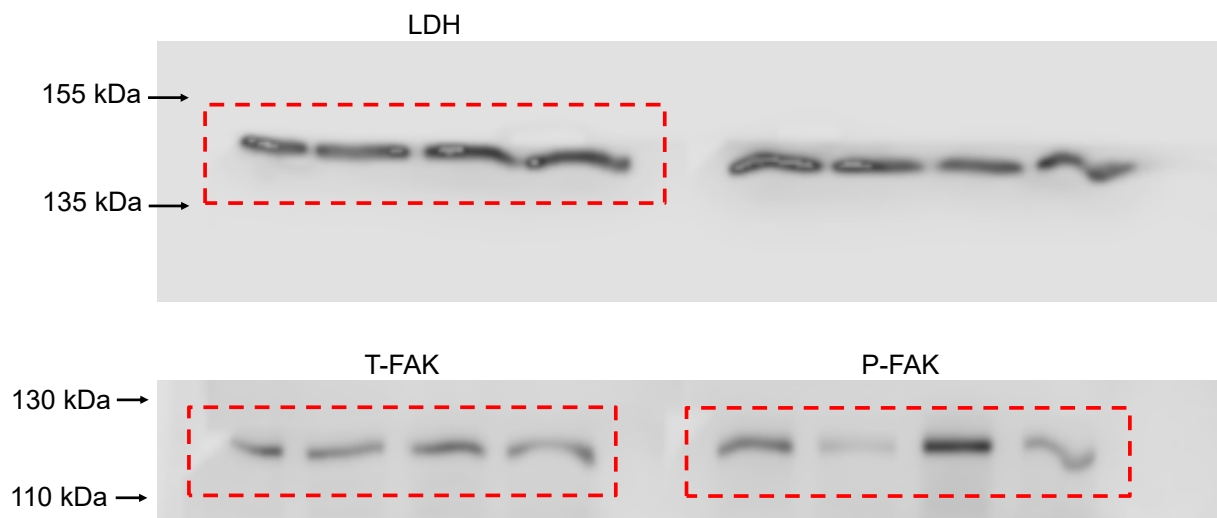

**Figure S6.** Unprocessed blots used in Figure S3 as obtained by LiCor C-DiGit blot scanner.
